RESEARCH ARTICLE

# Basal IFN $\lambda$ 2/3 signaling is required for ISG expression and viral control in human intestinal epithelial cells

Yagmur Keser, Zehra Sena Bumin, Amelia Perez Valiente, Sorin O. Jacobs, Steeve Boulant\*, Megan L. Stanifer<sup>ID</sup>\*

Department of Molecular Genetics and Microbiology, University of Florida, College of Medicine, Gainesville, Florida, United States of America

\* [m.stanifer@ufl.edu](mailto:m.stanifer@ufl.edu) (MLS); [s.boulant@ufl.edu](mailto:s.boulant@ufl.edu) (SB)

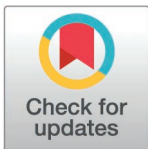

## OPEN ACCESS

**Citation:** Keser Y, Bumin ZS, Perez Valiente A, Jacobs SO, Boulant S, Stanifer ML (2026) Basal IFN $\lambda$ 2/3 signaling is required for ISG expression and viral control in human intestinal epithelial cells. PLoS Pathog 22(1): e1013857. <https://doi.org/10.1371/journal.ppat.1013857>

**Editor:** Helen M Lazear, University of North Carolina at Chapel Hill, UNITED STATES OF AMERICA

**Received:** August 13, 2025

**Accepted:** December 29, 2025

**Published:** January 12, 2026

**Peer Review History:** PLOS recognizes the benefits of transparency in the peer review process; therefore, we enable the publication of all of the content of peer review and author responses alongside final, published articles. The editorial history of this article is available here: <https://doi.org/10.1371/journal.ppat.1013857>

**Copyright:** © 2026 Keser et al. This is an open access article distributed under the terms of the [Creative Commons Attribution License](https://creativecommons.org/licenses/by/4.0/), which permits unrestricted use, distribution,

## Abstract

Interferon-lambdas (IFN $\lambda$ s) serve as critical mediators of antiviral defense at mucosal surfaces. Beyond their established role in regulating innate immune responses during infection, recent evidence demonstrates that IFN $\lambda$ s are constitutively expressed in pathogen-free environments, termed “basal” IFN expression. While intestinal epithelial cells constitutively express all basal IFN $\lambda$  subtypes (IFN $\lambda$ 1, IFN $\lambda$ 2, and IFN $\lambda$ 3), their individual contributions to antiviral immunity remain poorly defined. Here, we systematically investigate the distinct roles of IFN $\lambda$ 1 and IFN $\lambda$ 2/3 in regulating intrinsic antiviral immunity using human intestinal epithelial T84 cells. Through genetic depletion of IFN $\lambda$ 1 or IFN $\lambda$ 2/3, we show that basal IFN $\lambda$ 2/3, but not IFN $\lambda$ 1, is essential for restricting replication and spread of diverse viruses, including vesicular stomatitis virus (VSV), mammalian orthoreovirus (MRV), rotavirus (RV), and vaccinia virus (VV). Transcriptomic profiling revealed that IFN $\lambda$ 2/3 selectively controls the basal expression of interferon-stimulated genes (ISGs), including key antiviral effectors and components of the IFN signaling machinery (e.g., STAT1, STAT2, IRF9). Loss of IFN $\lambda$ 2/3 reduced total STAT1 protein levels and blunted responsiveness to exogenous IFN $\lambda$ , indicating compromised interferon signaling capacity. Furthermore, basal IFN $\lambda$ 2/3 was required for activating paracrine JAK/STAT signaling and ISG induction in neighboring bystander cells, thereby amplifying antiviral protection across the epithelial layer. These findings reveal a functional hierarchy among IFN $\lambda$  subtypes and establish IFN $\lambda$ 2/3 as the dominant, non-redundant regulators of epithelial immune readiness. Our study provides the first comprehensive analysis of basal IFN $\lambda$  subtype functions in the gut epithelium and underscores the central role of basal IFN $\lambda$ 2/3 in maintaining mucosal antiviral defense.

and reproduction in any medium, provided the original author and source are credited.

**Data availability statement:** The RNA-seq data generated in this study have been deposited in the NCBI Gene Expression Omnibus (GEO) under accession number GSE296527.

**Funding:** This work was supported by the National Institute of Allergy and Infectious Diseases (NIAID) of the National Institutes of Health under award number 1R01AI185510 to SB and 1R01AI189780 to MLS. YK, ZSB and MLS were financially supported by 1R01AI189780. SOJ and SB and financially supported by 1R01AI185510. The funders had no role in study design, data collection and analysis, decision to publish, or preparation of the manuscript.

**Competing interests:** The authors have declared that no competing interests exist.

## Author summary

Interferon-lambdas (IFN $\lambda$ s) are antiviral molecules that help protect the surfaces of our body, such as the gut and lungs, from infection. While IFN $\lambda$ s are best known for being produced during viral infections, recent work has shown that some IFN $\lambda$ s are also made at low levels even when no pathogen is present. This “basal” IFN activity acts like a constant security system that keeps cells alert and ready to respond quickly when a virus arrives. However, the specific roles of the different flavors of IFN $\lambda$  (i.e. IFN $\lambda$ 1, IFN $\lambda$ 2, and IFN $\lambda$ 3) in this baseline protection have remained unclear.

In this study, we investigated how each type of IFN $\lambda$  (IFN $\lambda$ 1, IFN $\lambda$ 2, and IFN $\lambda$ 3) contributes to antiviral readiness in human intestinal epithelial cells. By selectively removing each IFN $\lambda$ , we discovered that IFN $\lambda$ 2 and IFN $\lambda$ 3, but not IFN $\lambda$ 1, are essential for maintaining this built-in antiviral state. Cells lacking IFN $\lambda$ 2/3 became highly vulnerable to a wide range of viruses and lost the ability to activate key antiviral genes. Our findings reveal a previously unrecognized hierarchy among IFN $\lambda$ s and highlight IFN $\lambda$ 2/3 as critical guardians of gut antiviral defense, even before infection occurs.

## Introduction

Type I and type III interferons (IFNs) are central to the vertebrate innate immune response controlling viral infections [1–3]. Type III IFNs (IFN $\lambda$ s), the most recently identified type of IFNs, share several characteristics with type I IFNs [4,5]. Both families signal through receptor complexes that activate the JAK/STAT pathway, leading to the transcriptional induction of hundreds of interferon-stimulated genes (ISGs), which collectively inhibit viral replication and spread [6,7]. However, a notable distinction between type I and III IFNs, lies in their receptor distribution: while type I IFN receptors (IFNAR1/IFNAR2) are broadly expressed across most cell types [8], the IFN $\lambda$  receptor (IFNLR) is largely restricted to epithelial cells of the respiratory and gastrointestinal tracts, skin, and a subset of immune cells [9,10]. This restricted expression pattern positions IFN $\lambda$ s as specialized guardians of epithelial barriers, where they play a pivotal role in preventing pathogen dissemination and maintaining tissue homeostasis [9,10]. The IFN $\lambda$  family in humans is comprised of four members: IFN $\lambda$ 1 (IL-29), IFN $\lambda$ 2 (IL-28A), IFN $\lambda$ 3 (IL-28B), and IFN $\lambda$ 4. IFN $\lambda$ 2 and IFN $\lambda$ 3 are highly conserved and widely expressed across mammalian species, sharing 96% amino acid identity [11]. In contrast, IFN $\lambda$ 1 is expressed in humans and a subset of other primates, such as chimpanzees and great apes, but is absent in several other mammals, including mice, where it exists as a non-functional pseudogene [12–14]. IFN $\lambda$ 4 shows notable evolutionary variability across human populations, being expressed only in a subset of individuals. While certain alleles associated with IFN $\lambda$ 4 expression have been negatively selected in some populations, its relatively high

frequency in others, particularly African populations, indicates that IFN $\lambda$ 4 may also have conferred context-dependent advantages [4,5,15]. Although some studies have compared the antiviral activities of different IFN $\lambda$  subtypes, whether different IFN $\lambda$  subtypes have distinct biological functions remains unclear [11,16,17].

IFNs are primarily produced by cells in response to viral infections, orchestrating the body's antiviral defense mechanisms. Upon viral entry and replication, cellular pattern recognition receptors (PRRs) detect viral components, initiating a signaling cascade that leads to IFN production. Key PRRs include RIG-I-like receptors (RLRs), Toll-like receptors (TLRs), and cyclic GMP-AMP synthase (cGAS) [18–20]. RLRs, such as RIG-I and MDA5, primarily recognize double-stranded RNA (dsRNA) in the cytoplasm, TLRs sense bacterial membranes and viral genomes, while cGAS senses cytosolic DNA [21–23]. These PRRs initiate downstream signaling cascades through adaptor proteins (MAVS, TRIF/MyD88, or STING), leading to activation of TANK-binding kinase-1 (TBK1), which in turn phosphorylates interferon regulatory factor-3 (IRF3) and interferon regulatory factor-7 (IRF7). The phosphorylation of IRF3 and IRF7 results in their dimerization and translocation into the nucleus, where they act as transcription factors driving the expression of IFNs [24–26]. Once secreted, IFNs bind to their receptors on the same (autocrine) or neighboring (paracrine) cells, triggering the Janus kinase (JAK)-Signal Transducer and Activator of Transcription (STAT) signaling pathway. Phosphorylated STAT1 and STAT2 associate with interferon regulatory factor 9 (IRF9) to form the interferon-stimulated gene factor 3 (ISGF3) complex. ISGF3 acts as a transcription factor, regulating the expression of numerous interferon-stimulated genes (ISGs) that play pivotal roles in inhibiting viral replication and supporting the immune response against infections [8,27].

Traditionally, IFNs have been recognized for their role in driving an antiviral state in the host cells in response to pathogen challenges. However, recent studies have revealed that constitutive, or basal, expression of IFNs occurs even in pathogen-free environments, indicating a role beyond immediate immune defense [28,29]. Notably, type I IFNs, such as IFN $\beta$ , are constitutively expressed at low levels in healthy tissues/cells, where they play a crucial role in maintaining immune homeostasis [30–32]. This basal type I IFN expression is essential for regulating the expression of the components of the JAK/STAT signaling pathway, like STAT1 and STAT2, thereby priming cells for a swift and robust response upon encountering pathogens [30]. In the absence of IFN $\beta$  signaling, studies have observed reduced levels of STAT1, STAT2, IRF1, and IRF7 in cells maintained in sterile environment, making them less responsive to interferon signaling and more susceptible to subsequent infection [33–35]. This underscores the importance of basal interferon signaling in sustaining the readiness of the innate immune system.

Previously studies aiming at understanding the functions of basal interferon largely focused on type I IFNs [28–35]. More recently, IFN $\lambda$ s have also been shown to contribute to immune homeostasis. Recent studies demonstrated that the intestinal microbiota could drive localized, homeostatic IFN $\lambda$  production that primes discrete epithelial niches for antiviral protection in mice [36,37]. In parallel, our recent work revealed that IFN $\lambda$ s are also constitutively expressed in human intestinal epithelial cells under sterile conditions, independent of microbial cues [36,38]. Their expression correlates with epithelial confluency and is driven by the detection of cytosolic mitochondrial DNA via the cGAS/STING pathway [39]. These findings collectively highlight that IFN $\lambda$  signaling operates across multiple homeostatic layers: one induced by the microbiota and one arising intrinsically from self-DNA sensing. Despite the well-established antiviral role of virus-induced IFN $\lambda$ s, the specific contributions of basal IFN $\lambda$  signaling remains poorly understood. How individual IFN $\lambda$  subtypes uniquely shape immune preparedness and epithelial homeostasis in human intestinal epithelial cells is still unclear.

Using CRISPR-edited human intestinal epithelial cell lines deficient in IFN $\lambda$ 1 or IFN $\lambda$ 2/3, we demonstrate that basal IFN $\lambda$ 2/3, but not IFN $\lambda$ 1, is essential for restricting infection by a broad range of viral pathogens, including rotavirus (RV), mammalian reovirus (MRV), vesicular stomatitis virus (VSV), and vaccinia virus (VV). Mechanistically, IFN $\lambda$ 2/3 governs both autocrine and paracrine JAK/STAT signaling and is required to sustain basal expression of core ISGs, including STAT1, IRF7, and RIG-I. Loss of basal IFN $\lambda$ 2/3 results in reduced total STAT1 levels and impaired responsiveness to exogenous IFN $\lambda$  stimulation, demonstrating that basal expression of IFN $\lambda$ 2/3 is critical to protect against forthcoming viral infection by regulating the immune readiness of host cells. These findings uncover a previously unappreciated, non-redundant role for

basal IFN $\lambda$ 2/3 compared to IFN $\lambda$ 1 in sustaining epithelial antiviral defense and establish a functional hierarchy among IFN $\lambda$  subtypes. Our work not only expands current understanding of mucosal immunity but also lays a foundation for future therapeutic strategies aimed at enhancing epithelial barrier defense through targeted modulation of basal IFN $\lambda$ 2/3 signaling.

## Results

**Intestinal epithelial cells upregulate IFN $\lambda$ 1 and IFN $\lambda$ 2/3 upon virus infection.** The importance of IFN $\lambda$ s in controlling viral infection in intestinal epithelial cells has been well described using cells depleted of the IFN $\lambda$  receptor [6,37,39–45], studies in mice have further demonstrated that loss of the cytokines *Ifnl2* and *Ifnl3* phenocopies the absence of *Ifnlr* signaling, underscoring their essential role in mucosal antiviral defense [44]. However, the relative contribution of the individual human IFN $\lambda$  subtypes, IFN $\lambda$ 1, IFN $\lambda$ 2, and IFN $\lambda$ 3, remains much less characterized. To investigate their contribution in controlling virus infection, the human intestinal epithelial T84 cells were infected with different viruses. We chose four different model viruses from different families and with different genomes to ensure that the measured contribution of each IFN $\lambda$  was not virus specific. We employed the negative-sense single-stranded RNA virus vesicular stomatitis virus (VSV) expressing GFP (VSV-GFP), the enteric double-stranded RNA viruses mammalian orthoreovirus (MRV) and rotavirus (RV) encoding the fluorescent protein UnaG (RV-UnaG), and the double-stranded DNA virus vaccinia virus (VV) expressing GFP (VV-GFP). Live-cell fluorescent imaging (VSV-GFP, RV-UnaG, or VV-GFP) or immunostaining of the MRV non-structural protein  $\mu$ NS confirmed that T84 cells are readily infectable by these viruses (Fig 1A–1D). To evaluate the expression and secretion levels of IFN $\lambda$ 1, IFN $\lambda$ 2, and IFN $\lambda$ 3, infected cells and their supernatants were collected at indicated time points. Transcriptional upregulation of IFN $\lambda$ s was assessed by quantitative real-time PCR (qRT-PCR) (Fig 1E–1H) and secretion of IFN $\lambda$ s in the supernatant of infected cells was addressed using enzyme-linked immunosorbent assay ELISA (Fig 1I–1L). Due to their high sequence similarity, IFN $\lambda$ 2 and IFN $\lambda$ 3 were analyzed together using qRT-PCR and ELISA to measure their transcriptional upregulation and secretion, respectively. Infection of the human intestinal epithelial cells by all viruses upregulated both IFN $\lambda$ 1 and IFN $\lambda$ 2/3 at the RNA (Fig 1E–1H) and protein levels (Fig 1I–1L).

## Recombinant IFN $\lambda$ subtypes exhibit comparable antiviral activity against viruses

To assess whether IFN $\lambda$  subtypes exhibit differential antiviral activity against these distinct classes of viruses, we pre-treated the intestinal epithelial cells T84 cells with increasing concentrations (0.0001–300 ng/mL) of IFN $\lambda$ 1, IFN $\lambda$ 2, or IFN $\lambda$ 3 for 24 hours prior to infection. Cells were subsequently infected with VSV expressing the luciferase gene (VSV-Luc), MRV, RV-UnaG, or VV-GFP in the presence of IFN $\lambda$ s. Viral replication was quantified using luciferase assays for VSV-Luc, immunostaining for the MRV non-structural protein  $\mu$ NS, and live-cell fluorescent imaging for RV-UnaG and VV-GFP (Fig 2A–2D). While at low concentrations of IFN $\lambda$ s, IFN $\lambda$ 2 and IFN $\lambda$ 3 were slightly more antiviral compared to IFN $\lambda$ 1 against MRV (Fig 2B) and RV-UnaG infections (Fig 2C), all IFN $\lambda$  subtypes conferred a dose-dependent antiviral protection against all tested viruses. Of note, individual viruses displayed variable sensitivity to IFN $\lambda$  treatment: VSV-Luc was highly sensitive to IFN $\lambda$ s and was fully inhibited at concentrations superior to 10 ng/mL whereas VV-GFP infection was more resistant to IFN $\lambda$  treatment and could not be fully suppressed, exhibiting only approximately 30% reduction in viral replication at the highest cytokine doses (Fig 2A and 2D). These differences are likely due to the high sensitivity of VSV to IFNs [46–48] and the efficient capacity of VV to block the IFN response [49,50]. Together, these results indicate that treatment of intestinal epithelial cells with recombinant IFN $\lambda$ 1, IFN $\lambda$ 2, and IFN $\lambda$ 3 exhibits broadly similar antiviral activities.

## Genetic depletion of IFN $\lambda$ 2/3, but not IFN $\lambda$ 1, drastically enhances viral replication and spread in human intestinal epithelial cells

While treatment with recombinant IFN $\lambda$  subtypes revealed comparable antiviral efficacy across diverse viruses (Fig 2), this approach may not fully illustrate the importance of each IFN $\lambda$  subtype when expressed at the endogenous levels. This might be relevant in T84 human intestinal epithelial cells as IFN $\lambda$ 2/3 appears more expressed compared to IFN $\lambda$ 1 in



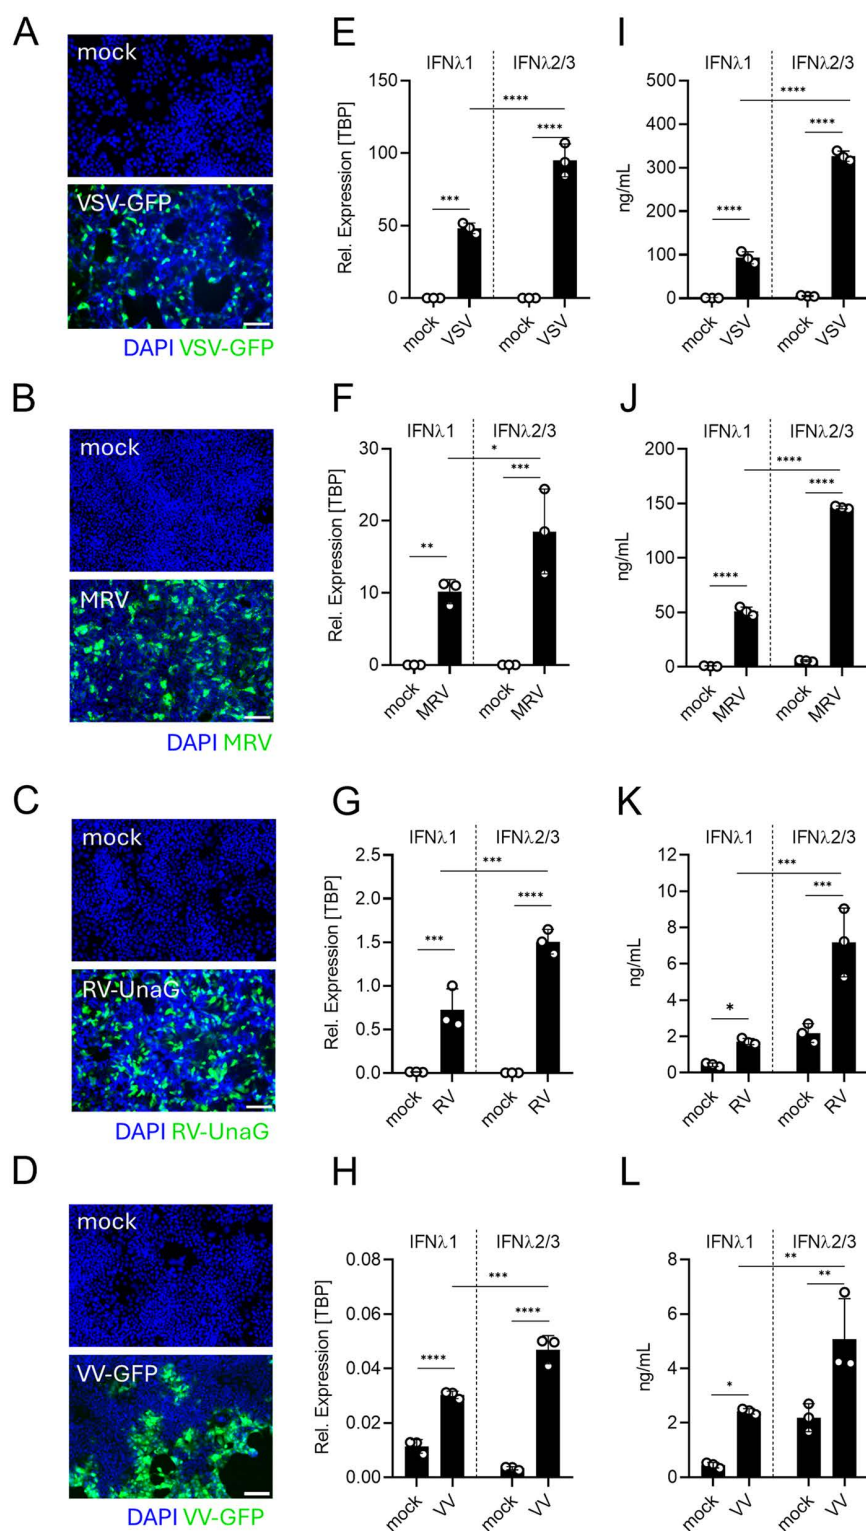

**Fig 1. IFNλ response of human intestinal epithelial cells to different virus types.** (A–D) T84 cells were seeded in 48-well plates and infected two days later with (A) VSV-GFP at an MOI of 1 for 7 hours, (B) MRV at an MOI of 1 for 16 hours, (C) RV-UnaG at an MOI of 1 for 16 hours and (D) VV-GFP at an MOI of 1 for 16 hours. (A) VSV-GFP (C) RV-UnaG and (D) VV-GFP infection was evaluated using live-cell microscopy; nuclei were stained with Hoechst. (B) MRV infection was assessed by immunostaining against the MRV μNS protein, and nuclei was stained using DAPI. (A–D) Representative

fluorescence images showing virus (green) and nuclei (blue). Scale bar = 100  $\mu$ m. (E–H) Total RNA was extracted from mock-infected or virus-infected T84 cells at (E) 7hpi of VSV-GFP and at 16hpi of (F) MRV, (G) RV-UnaG and (H) VV-GFP, followed by qRT-PCR analysis of IFN $\lambda$ 1 and IFN $\lambda$ 2/3 expression. Gene expression levels were normalized to TBP. (I–L) Supernatants collected from infected T84 cells at (I) 7hpi of VSV-GFP and at 16hpi of (J) MRV, (K) RV-UnaG and (L) VV-GFP, were analyzed by ELISA to quantify secreted IFN $\lambda$ 1 and IFN $\lambda$ 2/3 proteins following infection. Data represent  $\geq 3$  independent biological replicates. Statistical significance was determined by unpaired t-test (\* $P < 0.05$ , \*\* $P < 0.01$ , \*\*\* $P < 0.001$ , \*\*\*\* $P < 0.0001$ ). Error bars represent standard deviation with the mean as the center.

<https://doi.org/10.1371/journal.ppat.1013857.g001>

response to viral infection (Fig 1E–1L). To dissect the specific contributions of IFN $\lambda$ 1 versus IFN $\lambda$ 2/3 under physiological conditions, we generated T84 cell lines deficient of IFN $\lambda$ 1 (IFN $\lambda$ 1 KO) and IFN $\lambda$ 2/3 (IFN $\lambda$ 2/3 KO) using CRISPR/Cas9 approaches. Generation of IFN $\lambda$ 1 and IFN $\lambda$ 2/3 KO cells was validated by Sanger sequencing (S1A Fig). To functionally validate that these cell lines were knocked out for IFN $\lambda$ 1 and IFN $\lambda$ 2/3, we transfected WT, IFN $\lambda$ 1 KO, and IFN $\lambda$ 2/3 KO cells with poly I:C, a synthetic dsRNA mimic. In WT and IFN $\lambda$ 2/3 KO cells, IFN $\lambda$ 1 secretion was robustly induced following poly I:C transfection, whereas IFN $\lambda$ 1 KO cells showed no detectable secreted IFN $\lambda$ 1 (S1B Fig). Reciprocally, WT and IFN $\lambda$ 1 KO cells exhibited strong IFN $\lambda$ 2/3 secretion in response to poly I:C transfection, while IFN $\lambda$ 2/3 KO cells did not secrete IFN $\lambda$ 2/3 (S1C Fig). To directly address the importance of endogenous IFN $\lambda$ 1 and IFN $\lambda$ 2/3 in controlling viral infection we infected T84 WT, IFN $\lambda$ 1 KO, and IFN $\lambda$ 2/3 KO cells with VSV-GFP, RV-UnaG, MRV, and VV-GFP. Virus infection was assayed by live-cell fluorescent microscopy for VSV-GFP at 7 hpi, for RV-UnaG at 12 hpi, and for VV-GFP at 16 hpi (Fig 3A, 3C, and 3D). Indirect immunofluorescence of the non-structural protein  $\mu$ NS was used to evaluate MRV infection at 16 hpi (Fig 3B). Results showed that T84 cells depleted of IFN $\lambda$ 2/3 were infected to a higher degree as compared to WT and IFN $\lambda$ 1 KO cells for all four viruses tested (Fig 3A–3D). Interestingly, loss of IFN $\lambda$ 1 did not increase virus infection and IFN $\lambda$ 1 KO cells were infected to a similar degree as WT cells (Fig 3A and 3C) or less than WT cells (Fig 3B and 3D). These findings suggest that IFN $\lambda$ 2/3 KO cells are intrinsically more susceptible to viral infection compared to WT and IFN $\lambda$ 1 KO cells. To further investigate whether IFN $\lambda$ 1 and IFN $\lambda$ 2/3 are important to control virus spread over multiple rounds of infection, WT and IFN $\lambda$  KO cell lines were infected with VSV-GFP, RV-UnaG, and VV-GFP. Virus infections were monitored by live-cell fluorescence microscopy for 48 hours at an imaging interval of 2-hours (S2A–S2C Fig). In agreement with our previous findings, viral spread was markedly enhanced in IFN $\lambda$ 2/3 KO cells as compared to WT cells at both early and late stages of infection for all three viruses (S2A–S2C Fig). In contrast, IFN $\lambda$ 1 KO cells exhibited no differences in viral spread as compared to WT cells across all tested viruses (S2A–S2C Fig).

To verify that the observed phenotypes were not due to clonal artifacts in the IFN $\lambda$  KO cell lines, we repeated these experiments using polyclonal IFN $\lambda$  knockout cells (S3 Fig). First, we assessed IFN $\lambda$  production following poly(I:C) stimulation by ELISA, which confirmed a marked reduction of the corresponding IFN $\lambda$  subtypes in each polyclonal KO population (S3A–S3C Fig). Next, we tested their susceptibility to viral infection by infecting IFN $\lambda$ 1 KO and IFN $\lambda$ 2/3 KO polyclonal cells with VSV-GFP (S3D, S3E Fig) and RV-UnaG (S3F and S3G Fig). Live-cell fluorescence microscopy revealed that IFN $\lambda$ 2/3 KO polyclonal cells were consistently more susceptible to infection, while IFN $\lambda$ 1 KO polyclonal cells displayed infection levels similar to, or lower than, WT cells (S3D–S3G Fig). Together, these findings highlight the critical role of endogenous IFN $\lambda$ 2/3 in conferring the human intestinal epithelial cell T84 cells antiviral protection. On the contrary, endogenous IFN $\lambda$ 1 does not appear to significantly contribute to this antiviral defense.

### Inhibition of basal IFN $\lambda$ 2/3, not IFN $\lambda$ 1, signaling enhances virus infection

IFN $\lambda$ s are classically recognized for their induction upon viral infection; however, we recently demonstrated that IFN $\lambda$ s are also constitutively expressed in sterile, uninfected epithelial cells [39]. This basal IFN $\lambda$  expression is driven by cGAS–STING activation in response to cytosolic mitochondrial DNA (mtDNA) [39]. After observing that genetic depletion of IFN $\lambda$ 2/3 markedly increases early viral infection (Fig 3), we next sought to determine whether this heightened susceptibility reflects the loss of basal IFN $\lambda$ 2/3 signaling or impaired virus-induced IFN $\lambda$ 2/3 production. To distinguish between these possibilities, we first

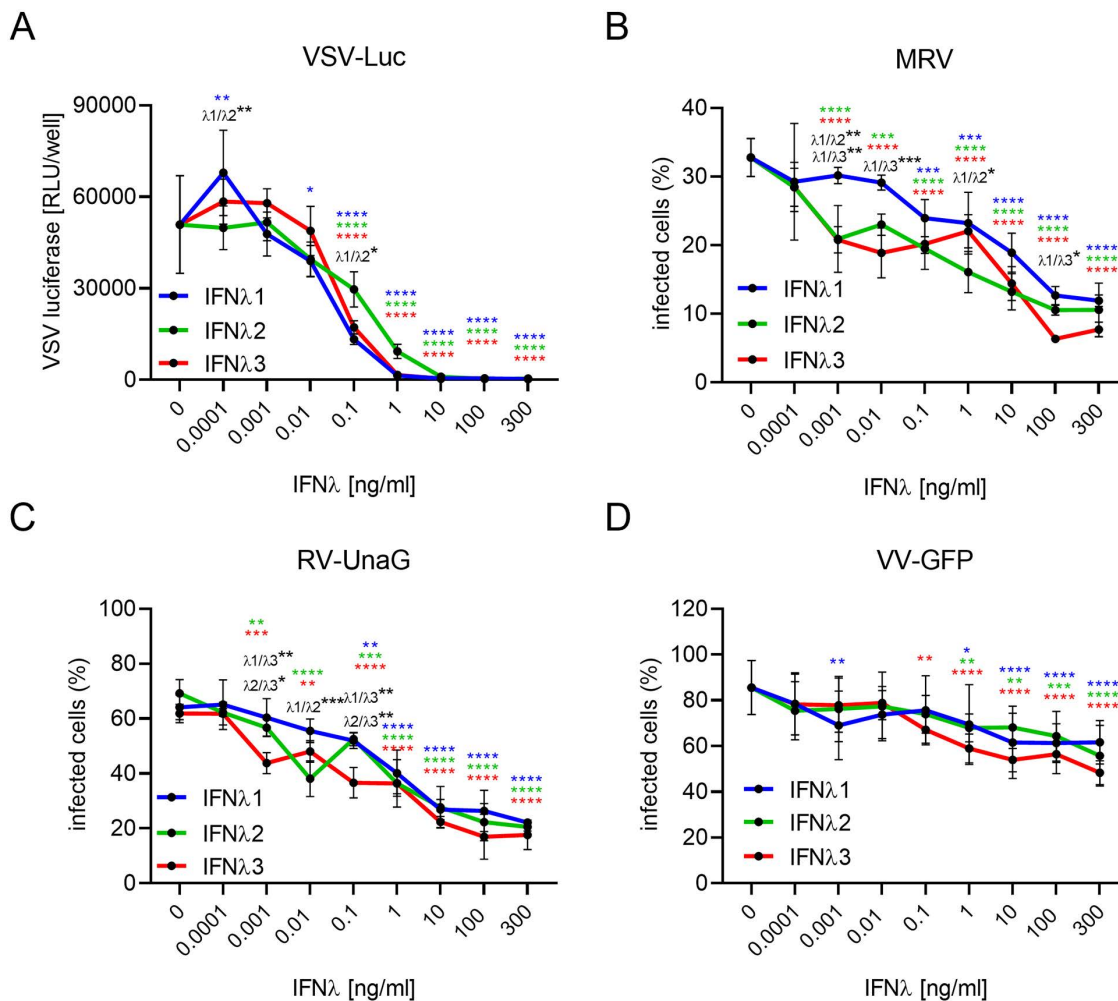

**Fig 2. Recombinant IFN $\lambda$  subtypes exhibit comparable antiviral activity against diverse virus types in intestinal epithelial cells.** T84 cells were seeded in 96-well plates and treated the following day with increasing concentrations (0.0001–300 ng/mL) of recombinant IFN $\lambda$ 1, IFN $\lambda$ 2, or IFN $\lambda$ 3 for 24 hours prior to infection. Cells were then infected with (A) VSV-Luc, (B) MRV, (C) RV-UnaG, or (D) VV-GFP, each at a multiplicity of infection (MOI) of 1. Infections were maintained in the presence of indicated dose of recombinant IFN $\lambda$ 1, IFN $\lambda$ 2, or IFN $\lambda$ 3. Infections were analyzed 7 hours post-infection (hpi) for VSV-Luc and 16 hpi for MRV, RV-UnaG, and VV-GFP. (A) VSV-Luc infection was quantified by luciferase assay. (B) MRV infection was assessed by immunofluorescence staining against the  $\mu$ NS protein, with DAPI used for nuclear staining. (C, D) RV-UnaG and VV-GFP infections were monitored via live-cell imaging; nuclei were stained with Hoechst. Data represent  $\geq 3$  independent biological replicates. Statistical significance between IFN $\lambda$ -treated conditions and the untreated control (0 ng/mL) was determined using two-way ANOVA with Sidak's post hoc correction (\* $P < 0.05$ , \*\* $P < 0.01$ , \*\*\* $P < 0.001$ ). Color-coded significance markers indicate comparisons between different doses and 0 ng/mL for each IFN $\lambda$  subtype (IFN $\lambda$  = blue, IFN $\lambda$ 2 = green and IFN $\lambda$ 3 = red). If not specified, comparisons are not significant (ns). Error bars represent standard deviation with the mean as the center.

<https://doi.org/10.1371/journal.ppat.1013857.g002>

used the STING inhibitor H151 [51] to selectively block basal IFN $\lambda$  signaling, followed by infection with VSV, whose detection is mediated predominantly by RNA sensors such as RIG-I and TLRs [52]. T84 WT cells were pre-treated with H151 for 2 days prior to VSV-Luc infection, and inhibition of basal IFN $\lambda$ 1 and IFN $\lambda$ 2/3 expression was confirmed by qRT-PCR (Fig 4A and 4B). Importantly, suppressing basal IFN $\lambda$  signaling did not impair virus-induced IFN $\lambda$  responses; in fact, H151-treated cells mounted a stronger VSV-induced IFN $\lambda$  expression than untreated controls (Fig 4A and 4B). Despite intact inducible signaling, inhibition of basal IFN $\lambda$ s significantly increased viral infection in WT cells (Fig 4C). This effect was specifically due

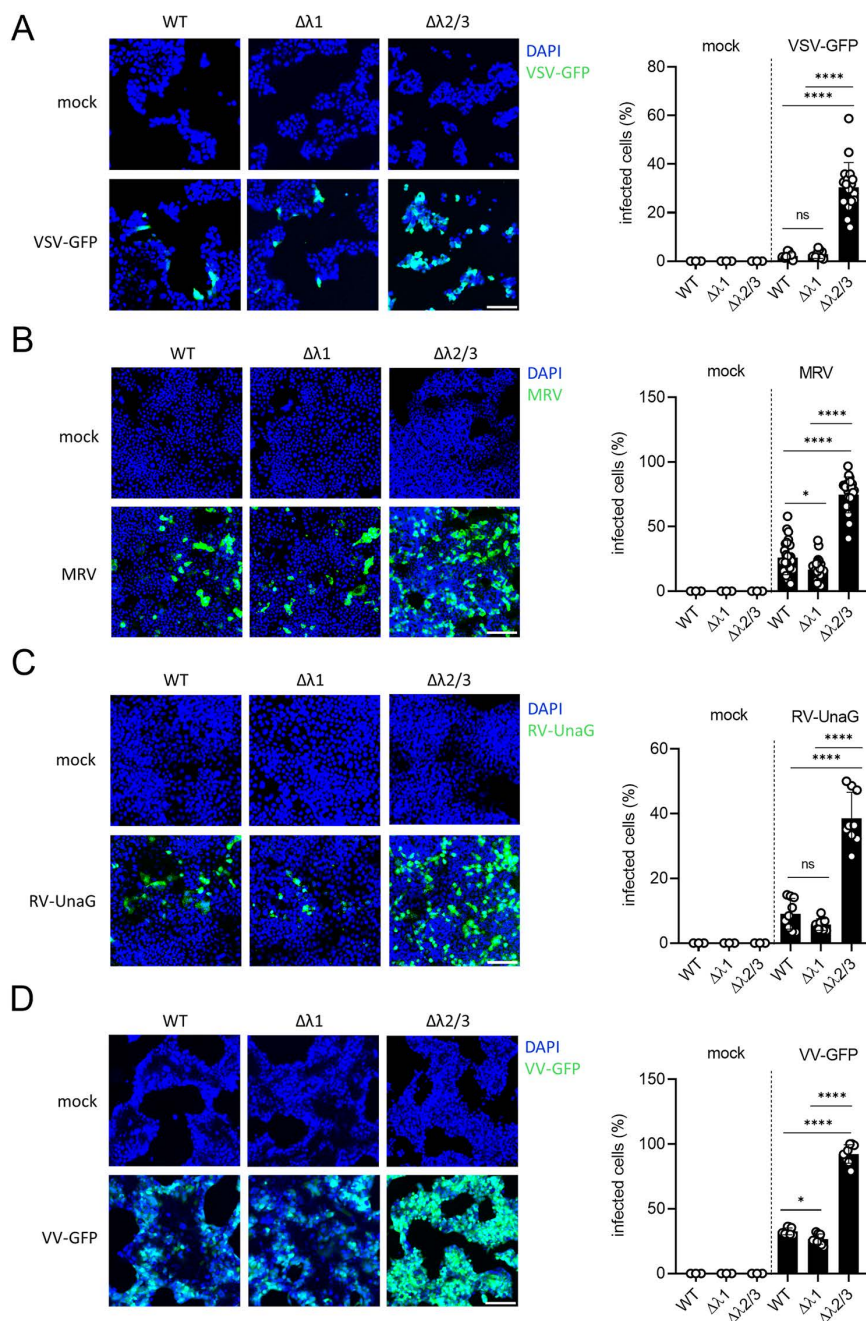

**Fig 3. Genetic depletion of IFN $\lambda$ 2/3, but not IFN $\lambda$ 1, enhances early infection by diverse viruses in human intestinal epithelial cells.** T84 WT, IFN $\lambda$ 1 KO, and IFN $\lambda$ 2/3 KO cells were seeded in 48-well plates and infected the following day. (A) Cells were infected with VSV-GFP (MOI=1), and infection was assessed at 7 hours post-infection (hpi) by live-cell microscopy. Nuclei were stained with Hoechst (blue), and infected cells are shown in green. (B) Cells were infected with MRV (MOI=1), and infection was evaluated at 16 hpi by immunostaining against the MRV  $\mu$ NS protein; nuclei were counterstained with DAPI. (C) Cells were infected with RV-UnaG (MOI=1), and infection was measured by live-cell microscopy at 12 hpi. (D) Cells were infected with VV-GFP (MOI=1), and infection was evaluated at 16 hpi using live-cell microscopy. (A–D) Representative images (left) and corresponding quantification (right) are shown for each virus. Scale bar = 100  $\mu$ m. Data represent  $\geq 3$  independent biological replicates. Statistical significance was determined by two-way ANOVA (\* $P < 0.05$ , \*\*\*\* $P < 0.0001$ , ns = not significant). Error bars represent standard deviation with the mean as the center.

<https://doi.org/10.1371/journal.ppat.1013857.g003>



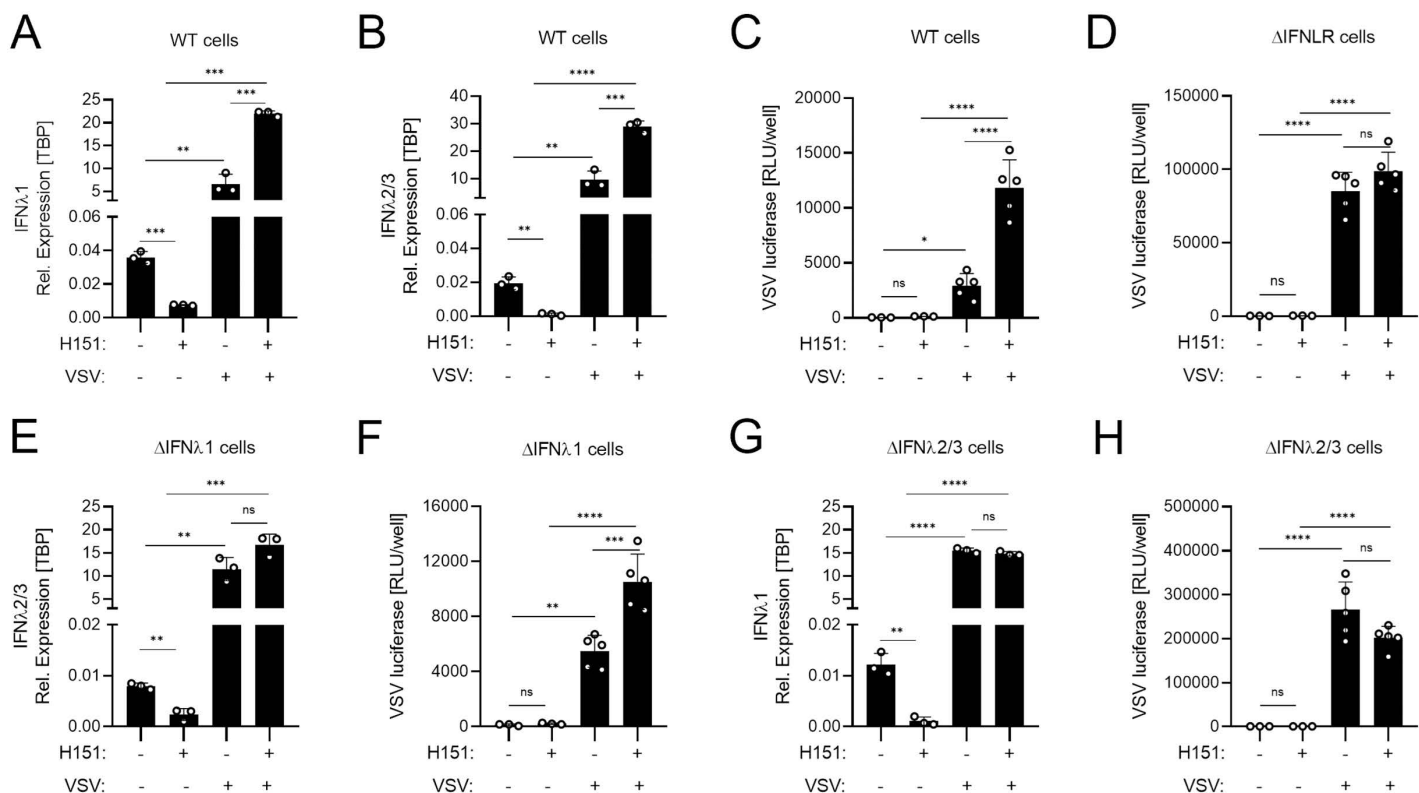

**Fig 4. STING-driven basal IFN $\lambda$ 2/3, not IFN $\lambda$ 1, expression is crucial to maintain basal ISGs and antiviral state.** (A–H) T84 WT, IFNLNLR KO, IFN $\lambda$ 1 KO, and IFN $\lambda$ 2/3 KO cells were seeded in (A, B, E, G) 48-well plate as 200,000 cell/well or (C, D, F, H) 96-well plate as 50,000 cell/well, and next day the media was replaced with 20  $\mu$ M H151 (STING inhibitor) or DMSO (solvent control). Cells were incubated with H151 or DMSO for 2 days and subsequently infected with VSV-Luc (MOI=1) for 7 hours in the continued presence or absence of H151. (A, B, E, G) Basal and virus-induced IFN $\lambda$ 1 and/or IFN $\lambda$ 2/3 expression was assessed by qRT-PCR. (C, D, F, H) Virus infection was quantified by luciferase assay. Relative expression was normalized to TBP. Data represent  $n \geq 3$  biological replicates. Statistical significance was determined using one-way ANOVA with multiple comparisons (\* $P < 0.05$ ; \*\* $P < 0.01$ ; \*\*\* $P < 0.001$ ; \*\*\*\* $P < 0.0001$ ; ns = not significant). Error bars represent standard deviation with the mean shown at the center.

<https://doi.org/10.1371/journal.ppat.1013857.g004>

to loss of basal IFN $\lambda$  signaling, as H151 treatment did not substantially alter viral infection in IFNLNLR KO cells [6] (Fig 4D). Notably, IFNLNLR KO cells showed a pronounced increase in initial infection of VSV-GFP, RV-UnaG, and VV-GFP infection (S4A–S4D Fig). In contrast, IFNAR KO cells [6] exhibited only a modest increase in VSV-GFP and RV-UnaG infection and showed no enhanced susceptibility to VV-GFP (S4A–S4D Fig). These results highlight that, in T84 epithelial cells, IFN $\lambda$  signaling provides the dominant antiviral protection, surpassing the contribution of type I IFN signaling.

To further dissect IFN $\lambda$  subtype-specific contributions to the basal antiviral state, we inhibited basal IFN $\lambda$ 2/3 expression in IFN $\lambda$ 1 KO cells (Fig 4E and 4F) using H151 (Fig 4E and 4F). Virus-induced IFN $\lambda$ 2/3 in IFN $\lambda$ 1 KO cells remained intact after H151 treatment, confirming selective inhibition of the basal, not induced, response (Fig 4F). Notably, inhibition of basal IFN $\lambda$ 2/3 in IFN $\lambda$ 1 KO cells significantly increased viral infection (Fig 4F). Similarly, we inhibited basal IFN $\lambda$ 1 expression in IFN $\lambda$ 2/3 KO cells (Fig 4G and 4H), and virus-induced IFN $\lambda$ 1 in IFN $\lambda$ 2/3 KO cells (Fig 4H). In contrast to WT and IFN $\lambda$ 1 KO cells, inhibition of basal IFN $\lambda$ 1 in IFN $\lambda$ 2/3 KO cells had no impact on infection (Fig 4H). Together, these results demonstrate that STING-driven basal IFN $\lambda$ 2/3, but not IFN $\lambda$ 1, is essential for maintaining epithelial antiviral readiness. More importantly, they reveal a functional hierarchy among IFN $\lambda$  subtypes at basal levels, with IFN $\lambda$ 2/3 serving as the dominant contributors to the pre-existing antiviral state.

## IFN $\lambda$ 2/3 are the primary regulators of basal ISG expression in intestinal epithelial cells

Basal IFN expression is known to regulate steady-state ISG levels and plays a critical role in preparing cells for future viral challenges. In the context of type I IFNs, basal IFN $\beta$  expression has been shown to sustain the expression of key ISGs that confer intrinsic antiviral protection, while also regulating components of the JAK/STAT signaling pathway, thereby priming cells for a swift and robust response upon encountering pathogens [28–35]. Using H151, we could show that suppressing basal IFN $\lambda$ 2/3, but not IFN $\lambda$ 1, significantly increased viral susceptibility (Fig 4). These findings demonstrate that basal IFN $\lambda$ 2/3 expression is essential for establishing the epithelial antiviral state and suggest a subtype-specific hierarchy in which IFN $\lambda$ 2/3 serves as the dominant contributor to the intrinsic antiviral protection.

To determine whether intrinsic antiviral pathways are differentially regulated in the absence of basal IFN $\lambda$  signaling, and to define the individual contributions of IFN $\lambda$  subtypes to this basal antiviral state in intestinal epithelial cells, we performed transcriptomic analysis of T84 WT, IFN $\lambda$ 1 KO, and IFN $\lambda$ 2/3 KO cells. In addition, we also included IFNLR KO cells [6] to serve as a control for investigating the global importance of basal IFN $\lambda$  in regulating basal ISG expression. Principal component analysis (PCA) revealed that WT and IFN $\lambda$ 1 KO cells clustered together and were clearly separated from IFNLR KO and IFN $\lambda$ 2/3 KO cells (Fig 5A). Compared to WT cells, IFNLR KO cells and IFN $\lambda$ 2/3 KO cells displayed significant downregulation of canonical ISGs (Fig 5B and 5D), while IFN $\lambda$ 1 KO cells exhibited a smaller subset of differentially expressed ISGs with modest fold-change reductions (Fig 5C).

Similarly, Gene Ontology (GO) enrichment analysis of differentially expressed genes (DEGs) from each comparison (WT vs. KO cells) revealed robust enrichment of antiviral and innate immune pathways in WT cells, which were diminished in all knockout conditions (Fig 5E). Notably, loss of IFN $\lambda$ 2/3 or IFNLR resulted in a more substantial reduction in key pathways such as response to virus, regulation of innate immune response, and interferon-mediated signaling as compared to IFN $\lambda$ 1 KO cells (Fig 5E). Examination of the top 25 DEGs associated with the GO term “defense response to other organism” (GO:0098542) revealed marked downregulation of key antiviral ISGs (MX1, OAS1, IFIT1, ISG15) in both IFN $\lambda$ 2/3 KO and IFNLR KO cells (Fig 5F). In contrast, these genes were only modestly reduced in IFN $\lambda$ 1 KO cells (Fig 5F). Moreover, essential components of the IFN signaling machinery, including RIG-I, IRF7, STAT1, STAT2, and IRF9, were significantly reduced in IFN $\lambda$ 2/3 KO and IFNLR KO cells, but not in IFN $\lambda$ 1 KO cells (Fig 5F), further supporting a dominant role for basal IFN $\lambda$ 2/3 in the regulation of these immune processes. To rule out the possibility that transcriptomic changes arose from compromised cell viability rather than loss of IFN signaling, we evaluated gene sets associated with cell survival and apoptosis. Gene set enrichment analysis (GSEA) revealed no significant enrichment of these pathways (S5A–S5C Fig), and cytotoxicity assays confirmed that all cell lines maintained comparable viability (S5D Fig), supporting that the observed differences were specifically due to disruption of IFN $\lambda$  signaling.

To validate the loss of essential components of the IFN signaling machinery, we quantified ISG transcript and protein levels in T84 WT, IFN $\lambda$ 1 KO, IFN $\lambda$ 2/3 KO, and IFNLR KO cells. ISGs were selected from the top 25 most differentially expressed genes related to the GO term “defense response to other organisms” in the RNA-seq dataset (Fig 5F, asterisk-marked genes). qRT-PCR confirmed modest reductions in MX1, OAS1, ISG15, IRF7, RIG-I, and IFIT1 mRNA levels in IFN $\lambda$ 1 KO cells compared to WT cells. Importantly, a robust reduction of ISG expression was observed in IFN $\lambda$ 2/3 KO and IFNLR KO cells compared to WT cells (Fig 6A). This phenotype was also recapitulated in polyclonal (pc) KO populations: IFN $\lambda$ 1 KO polyclones displayed ISG levels comparable to WT cells, whereas IFN $\lambda$ 2/3 KO polyclones showed a significant reduction in basal ISG expression relative to WT, confirming that these differences reflect genuine subtype-specific functions rather than clonal variation (S6A–S6D Fig). Expression of the housekeeping gene TBP remained stable across all cell lines (S7 Fig), confirming that the observed differences were not due to general transcriptional defects. Consistent with our RNAseq and qRT-PCR results, Western blot analysis showed that IFN $\lambda$ 1 KO cells displayed a modest change in protein expression of MX1, IRF7, RIG-I, ISG15, and STAT1 compared to WT cells, while IFN $\lambda$ 2/3 KO and IFNLR KO cells showed reduced expression of these ISGs at the protein levels compared to WT cells (Fig 6B).

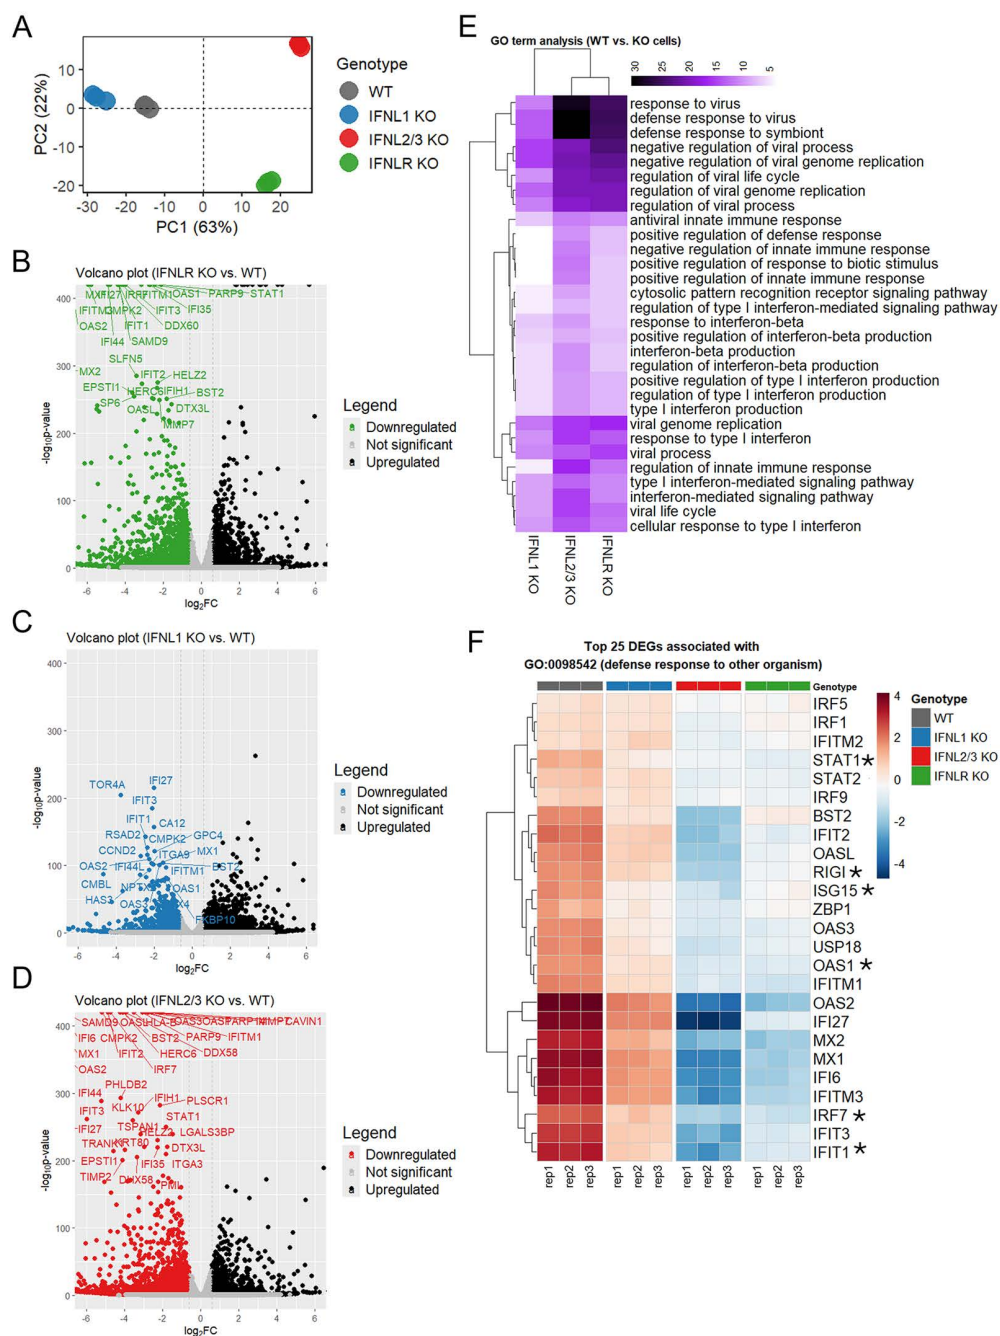

**Fig 5. RNA sequencing reveals the dominant role of basal IFNλ2/3 signaling in maintaining basal ISG levels in intestinal epithelial cells.** T84 WT, IFNλ1 KO, IFNλ2/3 KO, and IFNLR KO cells were seeded in 48-well plates and subjected to RNA sequencing three days post-seeding. (A) Principal Component Analysis (PCA) plot displaying the distribution of T84 WT, IFNλ1 KO, IFNλ2/3 KO, and IFNLR KO cells based on their gene expression profiles. Each point represents an individual sample, colored according to the experimental group. (B) T84 IFNLR KO vs. WT cells, (C) T84 IFNλ1 KO vs. WT cells, (D) T84 IFNλ2/3 KO vs. WT cells. (B-D) Each point represents a gene, plotted by its fold-change (x-axis) and statistical significance ( $-\log_{10}$  p-value, y-axis). Genes with significant differential expression ( $p < 0.05$ ) are highlighted in black (upregulated) and green, blue and red (downregulated). The most downregulated genes in KO cells are labeled. (E) Gene Ontology (GO) enrichment analysis was performed for Biological Process (BP) terms using the top 500 differentially expressed genes (DEGs) from each WT vs. KO cells comparison. The heatmap displays the top 30 GO terms ranked by their average significance score, and hierarchically clustered based on the similarity of their enrichment profiles. The color intensity represents the statistical significance of each GO term's enrichment, calculated as the  $-\log_{10}(p\text{-value})$ . (F) The heatmap displays the top 25 differentially expressed genes

associated with the biological process “innate immune response” (GO:0045087). Rows represent genes, columns represent samples, and hierarchical clustering was applied to both. Color intensity indicates relative expression levels (red: high; blue: low). Asterisk-marked genes are further validated in Fig 6A and 6B. Data represents three independent biological replicates.

<https://doi.org/10.1371/journal.ppat.1013857.g005>

Together, these results demonstrate that IFN $\lambda$ 2/3, rather than IFN $\lambda$ 1, are the primary regulators of basal ISG expression in intestinal epithelial cells. While IFN $\lambda$ 1 contributes modestly to the maintenance of basal innate immune signaling, the loss of IFN $\lambda$ 2/3 recapitulates the full extent of ISG suppression observed in IFNLR-deficient cells, underscoring the predominant and non-redundant role of IFN $\lambda$ 2/3 in maintaining epithelial basal immunity.

### Reduced STAT1 levels in IFN $\lambda$ 2/3 KO cells attenuate responsiveness of cells to exogenous IFN $\lambda$ stimulation

As basal IFN $\lambda$ 2/3 not only sustain basal ISG expression but also support the basal expression of key components of the interferon signaling machinery, such as STAT1, STAT2, and IRF9 (Figs 5F and 6A, B), we next sought to determine whether IFN $\lambda$ 2/3 KO cells retain the ability to respond to interferon stimulation at levels comparable to WT cells. To assess this, we treated T84 WT, IFN $\lambda$ 1 KO, and IFN $\lambda$ 2/3 KO cells with recombinant IFN $\lambda$ 1–3 and evaluated JAK/STAT pathway activation by Western blot for total and phosphorylated STAT1 (Fig 6C), along with ISG expression by qRT-PCR (Fig 6D). In both WT and IFN $\lambda$ 1 KO cells, IFN $\lambda$  treatment induced robust STAT1 phosphorylation and strong upregulation of ISGs (Mx1, OAS2, ISG15 and IFIT1) (Fig 6C and 6D). In contrast, although IFN $\lambda$ 2/3 KO cells remained responsive to stimulation, they displayed markedly reduced STAT1 phosphorylation and lower ISG induction, correlating with decreased total STAT1 protein levels (Fig 6C, 6D). These results indicate that basal IFN $\lambda$ 2/3 signaling is essential for maintaining expression of core signaling components, such as STAT1, thereby priming intestinal epithelial cells for a robust response to interferon. Altogether, our findings underscore the critical role of basal IFN $\lambda$ 2/3 in establishing and maintaining the responsiveness of intestinal epithelial cells to interferons.

### Basal IFN $\lambda$ 2/3, not IFN $\lambda$ 1, is crucial to induce basal ISGs expression

Our transcriptomic analysis suggests that IFN $\lambda$ 2/3 are the dominant contributors to the induction of basal ISGs in intestinal epithelial cells (Figs 5 and 6). To assess whether basal IFN $\lambda$ s can initiate paracrine JAK/STAT signaling, we performed a supernatant transfer assay. Cell culture supernatants (referred to as conditioned media) of T84 WT, IFN $\lambda$ 1 KO, and IFN $\lambda$ 2/3 KO cells were collected. As a negative control, we included conditioned media from IRF3 KO cells (S8A Fig), given that IRF3 is the essential transcription factor for IFN $\lambda$  production. As expected, IRF3 KO cells failed to produce either IFN $\lambda$ 1 or IFN $\lambda$ 2/3 under basal conditions (S8B Fig) or upon viral infection (S8C–S8D Fig). The collected conditioned media were immediately applied to naïve WT T84 cells, and STAT1 phosphorylation was assessed at 1 hpt as a readout of JAK/STAT activation (Fig 7A and 7B). Conditioned media from WT cells induced robust STAT1 phosphorylation, whereas media from IRF3 KO cells failed to activate STAT1, displaying levels comparable to culture media alone (DMEM-F12) (Fig 7B, left panel). This confirms that IRF3-dependent basal IFN production is required to activate JAK/STAT signaling (Fig 7B, left panel). Cells treated with conditioned media from IFN $\lambda$ 1 KO cells displayed a modest reduction in STAT1 phosphorylation relative to WT-conditioned media (Fig 7B, left panel), consistent with a partial contribution of IFN $\lambda$ 1 to basal signaling. In striking contrast, conditioned media from IFN $\lambda$ 2/3 KO cells almost completely lost the ability to induce STAT1 phosphorylation, demonstrating that basal IFN $\lambda$ 2/3 are the primary drivers of paracrine basal IFN signaling (Fig 7B, left panel). To confirm that STAT1 activation was specifically mediated by IFN $\lambda$ s present in the conditioned media, IFNLR KO cells were treated in parallel. As expected, no STAT1 phosphorylation was observed in IFNLR KO cells following any conditioned media treatment (Fig 7B, right panel), establishing that IFN $\lambda$ s, and not other secreted factors, are responsible for the observed JAK/STAT activation.

To determine whether the basal levels of IFN $\lambda$ s contained in the conditioned media is sufficient to upregulate ISGs, we extended the supernatant transfer assay by treating recipient cells with conditioned media for 24 hours and quantifying



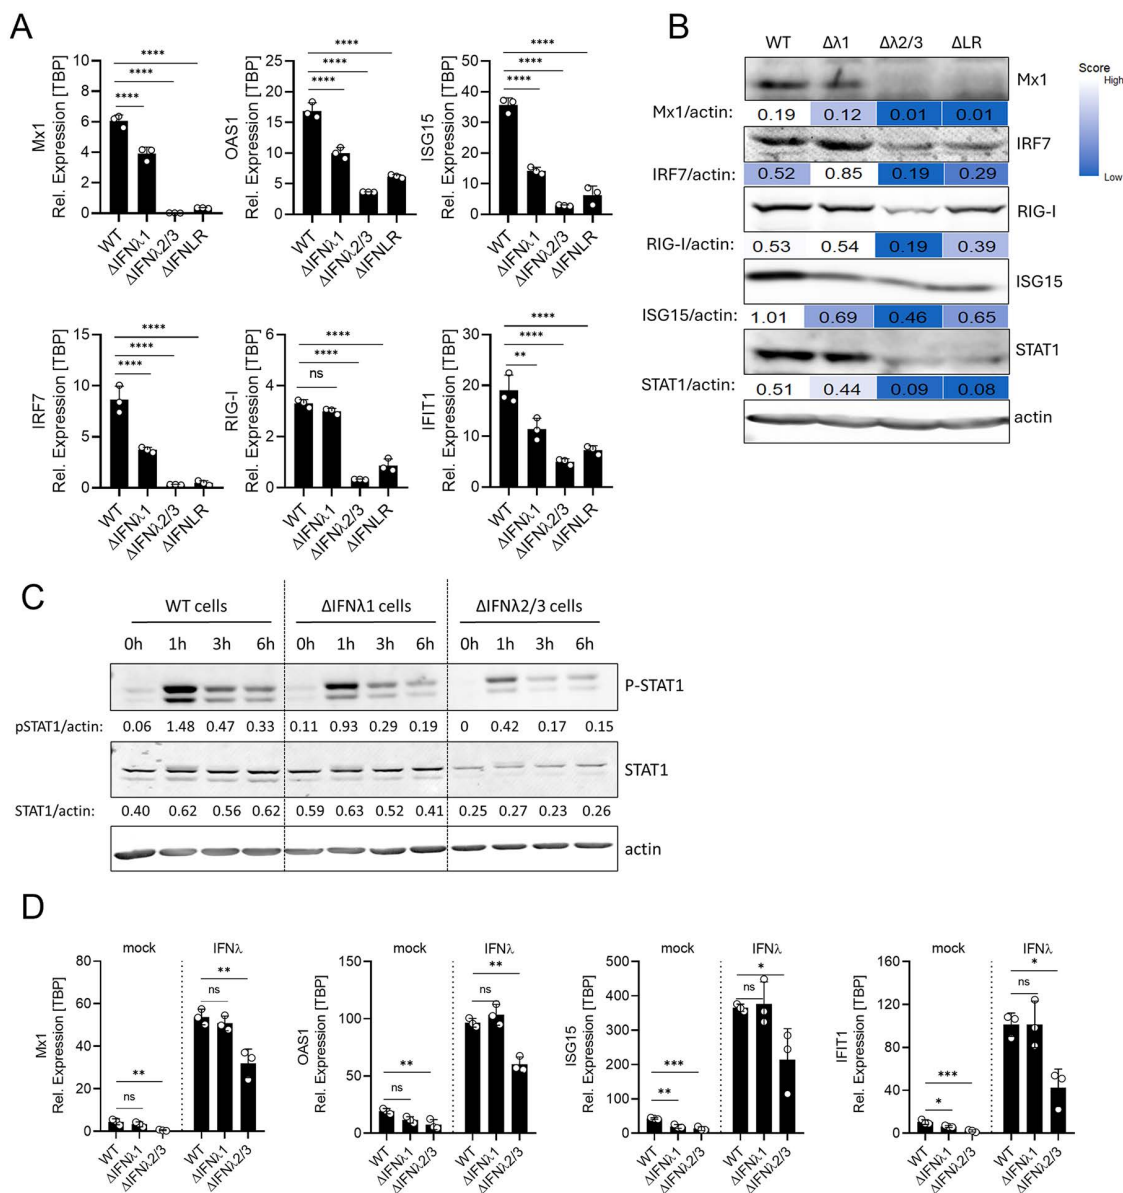

**Fig 6. The loss of basal IFN $\lambda$ 2/3 signaling strongly inhibits key ISGs expression and sensitivity to interferon stimulation.** (A) qRT-PCR analysis of select ISGs Mx1, OAS1, ISG15, IRF7, RIG-I, and IFIT1 in T84 WT, IFN $\lambda$ 1 KO, IFN $\lambda$ 2/3 KO, and IFNLR KO three days post-seeding. Relative expression was normalized to TBP. (B) Western blot analysis of select ISGs (Mx1, IRF7, RIG-I, ISG15 and STAT1) in T84 WT, IFN $\lambda$ 1 KO, IFN $\lambda$ 2/3 KO, and IFNLR KO three days post-seeding. Mx1, IRF7, RIG-I, ISG15 and STAT1 protein abundance was quantified relative to actin as loading control. Representative images shown. (C) T84 WT, IFN $\lambda$ 1 KO, IFN $\lambda$ 2/3 KO cells were treated with recombinant IFN1-3 proteins (100ng/mL) and cells were collected at 0-, 1-, 3-, and 6-hours post-treatment. Western Blot analysis of p-STAT1 and STAT1 was performed. P-STAT1 and STAT1 abundances were quantified relative to actin as loading control. Representative images shown. (D) Same as (C) but ISG (Mx1, OAS1, ISG15 and IFIT1) induction was assessed by qRT-PCR 24 h post-treatment. Relative expression was normalized to TBP. Data represent  $n \geq 3$  biological replicates. Statistical significance was determined using two-way ANOVA (\* $P < 0.05$ ,  $P < 0.01$  \*\*,  $P < 0.001$  \*\*\*,  $P < 0.0001$  \*\*\*\*, ns = not significant). Error bars represent standard deviation with the mean as the center.

<https://doi.org/10.1371/journal.ppat.1013857.g006>

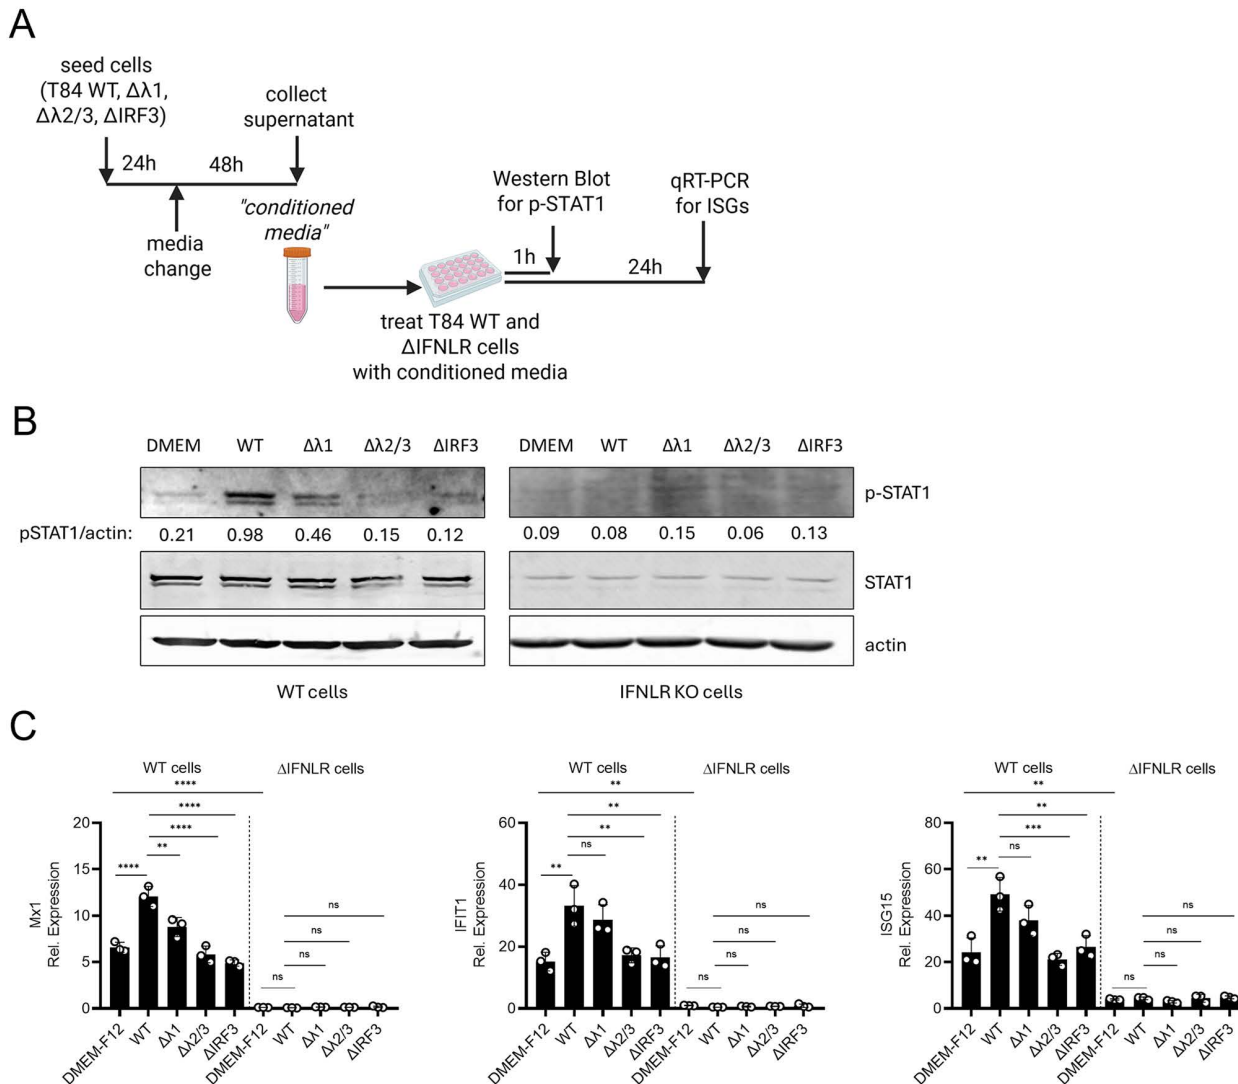

**Fig 7. Basal IFN $\lambda$ 2/3 is the primary driver of paracrine JAK/STAT signaling and ISG induction in human intestinal epithelial cells.** (A–C) T84 WT, IFN $\lambda$ 1 KO, IFN $\lambda$ 2/3 KO, and IRF3 KO cells were seeded in 6 well plates as  $2 \times 10^6$  cells/well, and the media was changed the following day with 1.5 mL fresh media. Two days later, the cell supernatant was collected after centrifugation at 2000rpm for 5 minutes (referred as conditioned media), and used to treat T84 WT and IFNLR KO cells. Cells were treated with culture media (DMEM-F12) as control. (A) Schematic representation of experimental design was created in BioRender Keser, Y. (2025) <https://BioRender.com/6ln3qq4>. (B) At 1-hour post-treatment (hpt), cells were harvested for Western blot analysis of STAT1 phosphorylation. P-STAT1 protein abundance was quantified relative to total actin, loading control. Representative images shown. (C) At 24 hours post-treatment, cells were harvested to assess ISG induction. qRT-PCR analysis of ISGs (Mx1, IFIT1, and ISG15) was performed following treatment by conditioned media. Relative expression was normalized to TBP. Data represent  $n \geq 3$  biological replicates. Statistical significance was determined using two-way ANOVA (\* $P < 0.05$ , \*\* $P < 0.01$ , \*\*\* $P < 0.001$ , \*\*\*\* $P < 0.0001$ , ns = not significant). Error bars represent standard deviation with the mean as the center.

<https://doi.org/10.1371/journal.ppat.1013857.g007>

ISG transcripts levels via qRT-PCR (Fig 7A and 7C). Consistent with our STAT1 activation results (Fig 7B), a robust induction of ISGs, including Mx1, IFIT1, and ISG15, was observed in cells treated with WT-conditioned media (Fig 7C). Conditioned media from IFN $\lambda$ 1 KO cells also elevated ISG expression relative to DMEM-F12, but significantly less than WT-conditioned media (Fig 7C), mirroring the modest decrease in ISGs observed in IFN $\lambda$ 1 KO cells (Fig 5C and 5F). In contrast, conditioned media from IFN $\lambda$ 2/3 KO or IRF3 KO cells failed to induce ISGs, resulting in transcript levels

indistinguishable from media-only controls (Fig 7C). As expected, IFNLR KO cells treated with condition media failed to induce any ISGs (Mx1, IFIT1, and ISG15) in response to any conditioned media tested, including those from WT cells, suggesting that IFN $\lambda$ s are solely responsible for basal JAK/STAT activation in T84 intestinal epithelial cells (Fig 7B and 7C). To confirm that IFN $\lambda$ s are the dominant antiviral factors, T84 WT-conditioned media was applied to cells depleted of the type I IFN receptor (IFNAR) and induction of ISGs was monitored 24 hours post-treatment. IFNAR depleted cells robustly induced Mx1 upregulation and conferred strong antiviral protection [6] (S9A–S9B Fig).

Together, these findings confirm that IFN $\lambda$ 2/3 are the principal drivers of basal JAK/STAT signaling and ISG expression in intestinal epithelial cells. Moreover, they highlight the essential role of IFN $\lambda$ 2/3 in maintaining mucosal immune readiness through basal interferon signaling, independent of viral infection or other inflammatory stimuli.

### Basal IFN $\lambda$ 2/3, not IFN $\lambda$ 1, is crucial to provide cells basal antiviral protection in a paracrine manner

The loss of ISG expression and the increased viral replication observed in IFN $\lambda$ 2/3 KO cells strongly suggest that basal IFN $\lambda$ 2/3 expression is essential for maintaining an antiviral state by sustaining steady-state ISG levels. To further investigate the functional contribution of basal IFN $\lambda$  expression to antiviral protection, we aimed to test the antiviral activity of basally produced IFN $\lambda$ 1 and IFN $\lambda$ 2/3. To this end, we performed an additional supernatant transfer assay (Fig 8A). Cell culture supernatants (referred to as conditioned media) of T84 WT, IFN $\lambda$ 1 KO, IFN $\lambda$ 2/3 KO, and IRF3 KO cells were collected and applied to T84 IRF3 KO cells for 24 hours. We used IRF3 KO cells as recipient cells as these cells do not produce IFNs upon viral challenges (S8C–S8D Fig) allowing us to specifically assess the antiviral effects of the basal IFN $\lambda$ s brought with the conditioned media. Following 24-hour pre-treatment with conditioned media, cells were infected with VSV-GFP, VSV-UnaG, and RV-UnaG, and infections were assessed at 7 hours post-infection (hpi) for VSV-GFP and VSV-Luc, and 16 hpi for RV-UnaG (Fig 8A). Pre-treatment with conditioned media from WT and IFN $\lambda$ 1 KO cultures significantly reduced VSV-GFP and VSV-Luc infection compared to cells treated with DMEM-F12 control media (Fig 8B–D). In contrast, conditioned media from IFN $\lambda$ 2/3 KO and IRF3 KO cultures failed to provide this protection, resulting in markedly higher infection levels compared to cells treated with WT media (Fig 8B–D). Likewise, pre-treatment with WT- and IFN $\lambda$ 1 KO-conditioned media significantly limited RV-UnaG infection (Fig 8E and 8F). Importantly, pre-treatment with IFN $\lambda$ 2/3- and IRF3 KO-conditioned media failed to limit RV-UnaG infection as compared to WT-conditioned media and display similar infection levels to DMEM-F12 control media (Fig 8E and 8F). These findings underscore the essential role of basal IFN $\lambda$ 2/3 in protecting the intestinal epithelial cells against virus infection in a paracrine manner. While IFN $\lambda$ 1 contributes modestly to baseline antiviral protection, its absence does not substantially impair host defense.

### Antibody-mediated neutralization revealed a functional hierarchy among basal IFN $\lambda$ subtypes

To further define the relative contribution of individual IFN $\lambda$  subtypes to basal antiviral immunity, we employed an antibody-based neutralization strategy using conditioned media. We first validated the specificity of the neutralizing antibodies against IFN $\lambda$ 1, IFN $\lambda$ 2, and IFN $\lambda$ 3 by treating cells with recombinant IFN $\lambda$  proteins in the presence or absence of specific neutralizing antibodies (S10 Fig). After confirming subtype specificity, conditioned media collected from T84 WT cells was incubated with neutralizing antibodies targeting either IFN $\lambda$ 1, IFN $\lambda$ 2, IFN $\lambda$ 3, or their combinations. The antibody-treated conditioned media was then applied to naïve T84 WT cells to assess JAK–STAT activation (1 h post-treatment) and ISG induction (16 h post-treatment) (Fig 9A). Consistent with our genetic knockout data, depletion of IFN $\lambda$ 2 or IFN $\lambda$ 3 from WT conditioned-media resulted in a marked reduction in STAT1 phosphorylation and a substantial decrease in MX1 expression (Fig 9B and 9C). In parallel, neutralized conditioned media was used to pre-treat T84 IRF3-KO cells prior to VSV-Luc infection to evaluate functional antiviral protection (Fig 9D). Importantly, conditioned media lacking IFN $\lambda$ 2 or IFN $\lambda$ 3 failed to confer antiviral protection, leading to VSV-Luc replication levels comparable to untreated controls (Fig 9E). Notably, combined neutralization of IFN $\lambda$ 2 and IFN $\lambda$ 3 did not further reduce signaling or antiviral activity beyond IFN $\lambda$ 2 or IFN $\lambda$ 3 alone, suggesting their redundant contribution to basal antiviral protection (Fig 9B–9E). In contrast, neutralization of IFN $\lambda$ 1

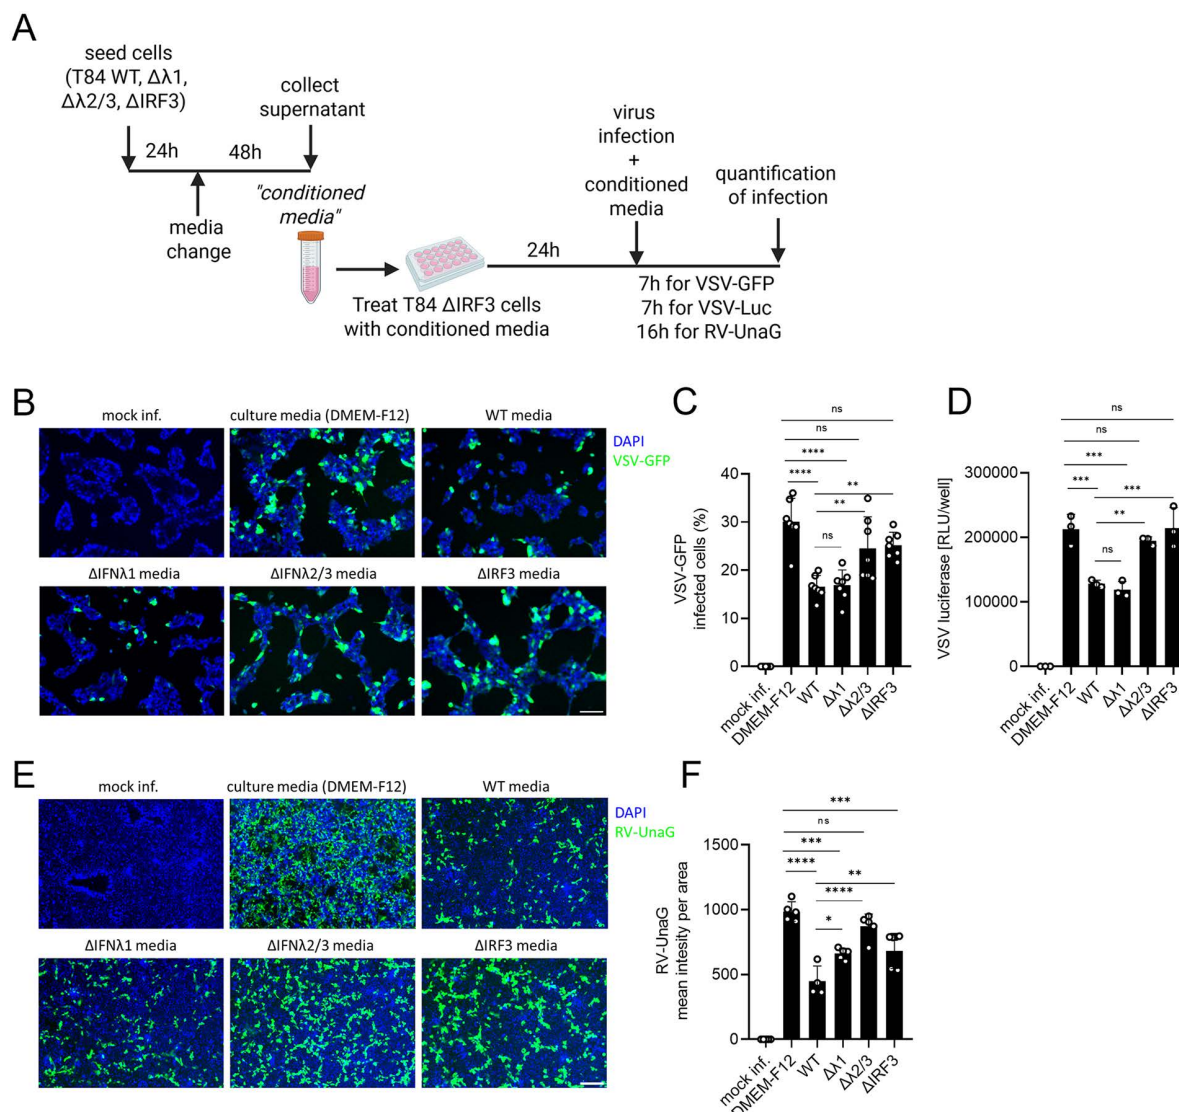

**Fig 8. Basal IFN $\lambda$ 2/3 signaling plays a dominant role in establishing an intrinsic antiviral state.** (A–F) T84 WT, IFN $\lambda$ 1 KO, IFN $\lambda$ 2/3 KO, and IRF3 KO cells were seeded in 6 well plates as  $2 \times 10^6$  cells/well, and the media was replaced the following day with 1.5 mL fresh media. Two days later, the cell supernatant was collected after centrifugation at 2000rpm for 5 minutes (referred to as conditioned media), and used to treat T84 IRF3 KO cells for 24 hours. Cells treated with culture media (DMEM-F12) served as a control. At 24 h post-treatment, cells were infected. (A) Schematic representation of experimental design was created in BioRender Keser, Y. (2025) <https://BioRender.com/f9bbe51>. (B, C) VSV-GFP, (D) VSV-Luc, and (E, F) RV-UnaG. (B) VSV-GFP infection was assessed by live-cell imaging at 7 hpi, with nuclei stained using Hoechst. (C) Quantification of B. (C) VSV-Luc replication was assessed by luciferase assay at 7 hpi. (D) RV-UnaG infection (16 hpi) was evaluated by live-cell imaging, with nuclei stained using Hoechst. (F) Quantification of E. (B, E) Representative images shown. Scale bar = 100  $\mu$ m. Data represent  $n \geq 3$  biological replicates. Statistical significance was determined using two-way ANOVA ( $P < 0.05$  \*,  $P < 0.01$  \*\*,  $P < 0.001$  \*\*\*,  $P < 0.0001$  \*\*\*\*, ns = not significant). Error bars represent standard deviation with the mean as the center.

<https://doi.org/10.1371/journal.ppat.1013857.g008>

caused only a modest reduction in pSTAT1 and MX1, and IFN $\lambda$ 1-depleted conditioned media largely preserved antiviral activity (Fig 9B–9E). Complete neutralization of all IFN $\lambda$  subtypes abolished STAT1 activation and ISG induction and fully phenocopied DMEM-F12 controls in antiviral assays, demonstrating that basal interferon-mediated protection in T84 cells is mainly dependent on IFN $\lambda$  signaling (Fig 9B–9E). Together, these results reveal a clear subtype-specific hierarchy in



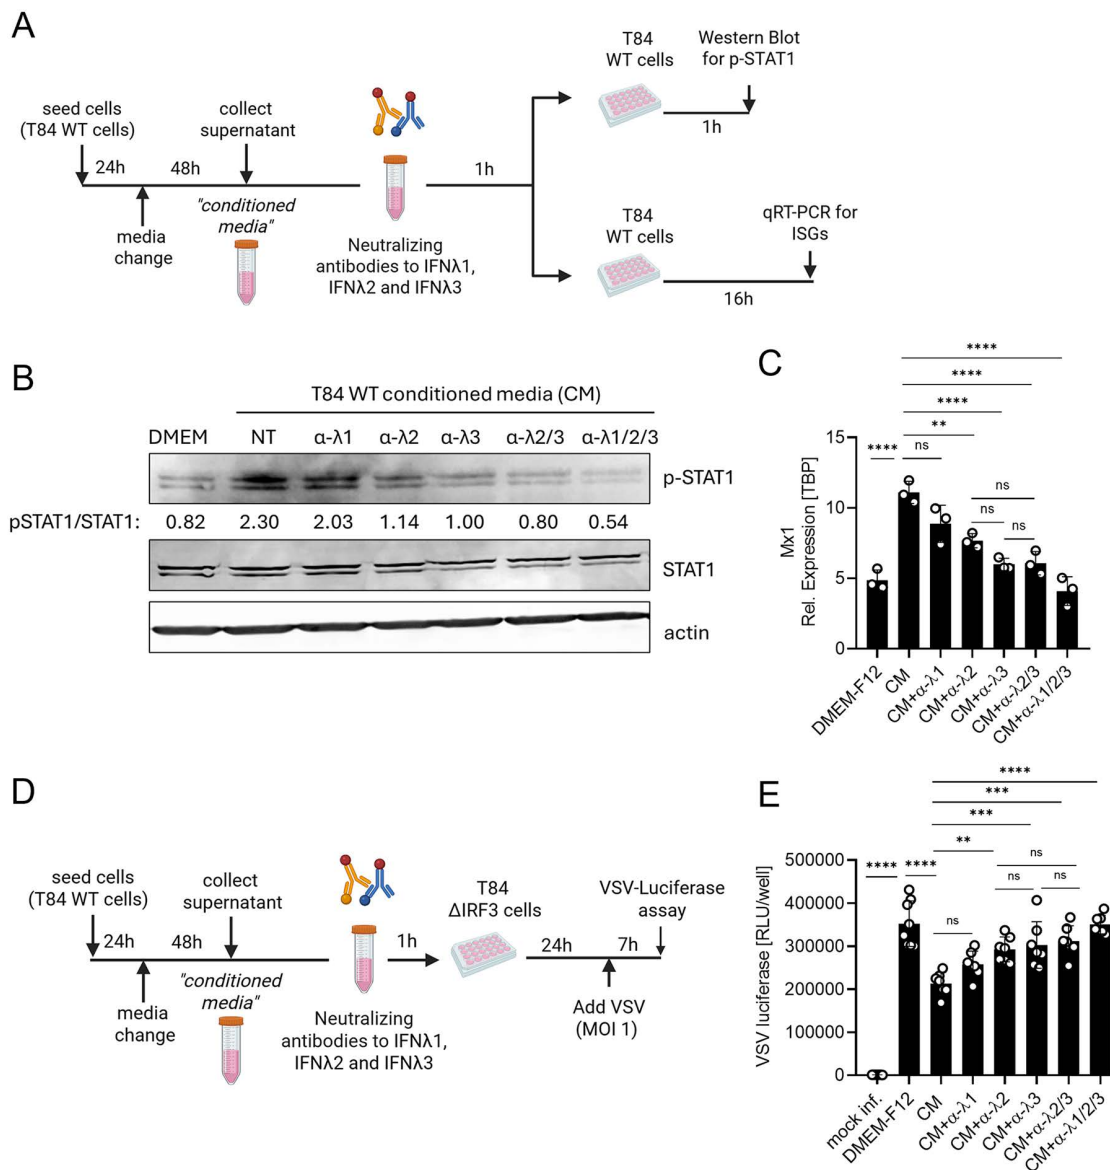

**Fig 9. Neutralization of basal IFNλ3 and IFNλ2, but not IFNλ1, abolishes constitutive JAK–STAT signaling and antiviral protection.** (A) Schematic of the conditioned-media (CM) neutralization workflow was created in BioRender Keser, Y. (2025) <https://BioRender.com/drh0ch2>. T84 WT cells were seeded in 6 well plates as  $2 \times 10^6$  cells/well, and the media was replaced the following day with 1.5 mL fresh media. Two days later, the cell supernatant was collected after centrifugation at 2000rpm for 5 minutes (referred to as conditioned media (CM)). This conditioned media were incubated with neutralizing antibodies targeting IFNλ1 (α-λ1), IFNλ2 (α-λ2), IFNλ3 (α-λ3), IFNλ2/3 (α-λ2/3), or all three subtypes (α-λ1/2/3) for 1 h at room temperature. Antibody-treated CM were applied to T84 WT cells for analysis of STAT1 phosphorylation (1 h post-treatment) and ISG expression (16 h post-treatment). (B) Representative Western blots showing pSTAT1, total STAT1, and actin as a loading control following treatment with antibody-depleted CM. p-STAT1 protein abundance was quantified relative to STAT1. (C) qRT-PCR analysis of MX1 expression (normalized to TBP) 16 h after antibody-depleted CM treatment. (D) Same as A except CM were used to pre-treat T84 IRF3-KO cells for 24 h prior to VSV-Luc (MOI = 1) infection to assess antiviral activity at 7 hpi. Created in BioRender Keser, Y. (2025) <https://BioRender.com/1zuuiu9o>. (E) VSV-Luciferase assay in T84 IRF3-KO cells pre-treated with antibody-depleted CM at 7 hpi. Data represent  $n \geq 3$  biological replicates. Statistical significance was determined using one-way ANOVA with multiple-comparison correction (\* $P < 0.05$ , \*\* $P < 0.01$ , \*\*\* $P < 0.001$ , \*\*\*\* $P < 0.0001$ , ns = not significant). Error bars represent standard deviation with the mean as the center.

<https://doi.org/10.1371/journal.ppat.1013857.g009>

basal epithelial immunity: IFN $\lambda$ 3 and IFN $\lambda$ 2 are the principal mediators of constitutive JAK–STAT activation and antiviral defense, whereas IFN $\lambda$ 1 plays only a minor supporting role.

### Replenishment of IFN $\lambda$ 2 and IFN $\lambda$ 3 restores basal antiviral state in IFN $\lambda$ 2/3-deficient cells

To determine whether exogenous IFN $\lambda$ 2 or IFN $\lambda$ 3 can reconstitute basal antiviral signaling in the absence of endogenous IFN $\lambda$ 2/3, we first sought to approximate the physiological amount of each IFN $\lambda$  subtype present in T84 WT conditioned media. Because IFN $\lambda$ 2/3 protein levels are below the detection limit of ELISA kits, we first used a bioassay-based calibration to identify the range of recombinant IFN $\lambda$ 2 and IFN $\lambda$ 3 concentrations that mimic the antiviral protection conferred by conditioned medium from T84 WT cells (Fig 10A). Titration of recombinant IFN $\lambda$ 2 and IFN $\lambda$ 3 revealed that approximately 1 ng/mL of IFN $\lambda$ 3 closely mimicked the antiviral activity of WT conditioned media, whereas IFN $\lambda$ 2 required slightly higher doses (approximately 5 ng/mL) to achieve comparable protection (Fig 10A and 10B). These findings indicate that IFN $\lambda$ 3 possesses greater antiviral potency than IFN $\lambda$ 2 at equivalent concentrations.

Next, we tested whether chronic supplementation with physiological doses of IFN $\lambda$ 2 (5 ng/mL), IFN $\lambda$ 3 (1 ng/mL), or both could restore basal antiviral signatures in T84 IFN $\lambda$ 2/3 KO cells. After two weeks of continuous IFN $\lambda$ 2 and/or IFN $\lambda$ 3 treatment, cells were seeded in the absence of exogenous IFN $\lambda$ s. Then we assessed their basal ISG expressions by qRT-PCR and Western Blot, and antiviral protection against VSV-Luc (Fig 10C). Chronic IFN $\lambda$ 2 or IFN $\lambda$ 3 supplementation alone efficiently increased levels of IRF7, RIG-I, and STAT1 proteins (Fig 10D), restored ISG expression (MX1, IFIT1, OAS1) (Fig 10E), and substantially reduced VSV-Luc replication in IFN $\lambda$ 2/3 KO cells (Fig 10F). Notably, combined supplementation with IFN $\lambda$ 2 and IFN $\lambda$ 3 did not further increase ISG expression or antiviral protection beyond IFN $\lambda$ 3 alone, indicating that IFN $\lambda$ 3 is the dominant subtype while IFN $\lambda$ 2 provides a secondary, non-additive contribution (Fig 10D–10F).

We previously showed that IFN $\lambda$ 2/3 KO cells respond poorly to IFN $\lambda$  stimulation compared to T84 WT cells, exhibiting markedly reduced STAT1 phosphorylation, likely due to their intrinsically low total STAT1 abundance (Fig 6C and 6D). To test whether physiological replenishment of IFN $\lambda$ 2/3 can restore this responsiveness, IFN $\lambda$ 2/3 KO cells were chronically supplemented with IFN $\lambda$ 2 (5 ng/mL) and/or IFN $\lambda$ 3 (1 ng/mL) for two weeks. Cells were then reseeded in the absence of exogenous cytokines and acutely re-stimulated with recombinant IFN $\lambda$ 1–3 for 1 hour (Fig 10G). As expected, acute IFN $\lambda$ 1–3 stimulation induced robust STAT1 phosphorylation in T84 WT cells, whereas IFN $\lambda$ 2/3 KO cells showed strongly reduced activation (Fig 10H). Chronic supplementation with IFN $\lambda$ 2 and/or IFN $\lambda$ 3 increased total STAT1 abundance in IFN $\lambda$ 2/3 KO cells, which correspondingly enhanced pSTAT1 levels following acute IFN $\lambda$  stimulation, indicating a significant restoration of JAK–STAT pathway responsiveness (Fig 10H). Interestingly, downstream ISG expression (MX1, IFIT1, and OAS1) did not follow this pattern. Despite the increase in STAT1 protein and phosphorylation, IFN $\lambda$ 2/3 KO cells chronically supplemented with IFN $\lambda$ 2 and/or IFN $\lambda$ 3 did not exhibit enhanced ISG induction in response to acute IFN $\lambda$  treatment (Fig 10I). This muted transcriptional response is likely due to persistent negative feedback mechanisms that limit further ISG induction after prolonged exposure to IFN $\lambda$ . Together, these results demonstrate that both IFN $\lambda$ 2 and IFN $\lambda$ 3 subtypes cooperate to sustain the intact basal antiviral protection. Physiological replenishment of IFN $\lambda$ 2 and/or IFN $\lambda$ 3 is therefore sufficient to reconstruct the basal ISGs and antiviral state lost in IFN $\lambda$ 2/3 KO cells.

## Discussion

Intestinal epithelial cells utilize interferon lambda (IFN $\lambda$ ) as a defense mechanism in response to viral infection [7,53]. However, even in the absence of pathogens, epithelial cells produce basal IFN $\lambda$ s that sustain low-level expression of interferon-stimulated genes (ISGs) in sterile, non-infected conditions [40,54]. Here, we demonstrate distinct and nonredundant roles for basal IFN $\lambda$  subtypes in establishing an antiviral state, independent of their well-known functions during virus-induced responses. Our work reveals that although both IFN $\lambda$ 1 and IFN $\lambda$ 2/3 are expressed basally, IFN $\lambda$ 2/3 is the dominant driver of the baseline antiviral environment that pre-arms intestinal epithelial cells against viral infection. Transcriptomic profiling showed that IFN $\lambda$ 2/3-deficient cells exhibit globally diminished ISG expression relative to wild-type

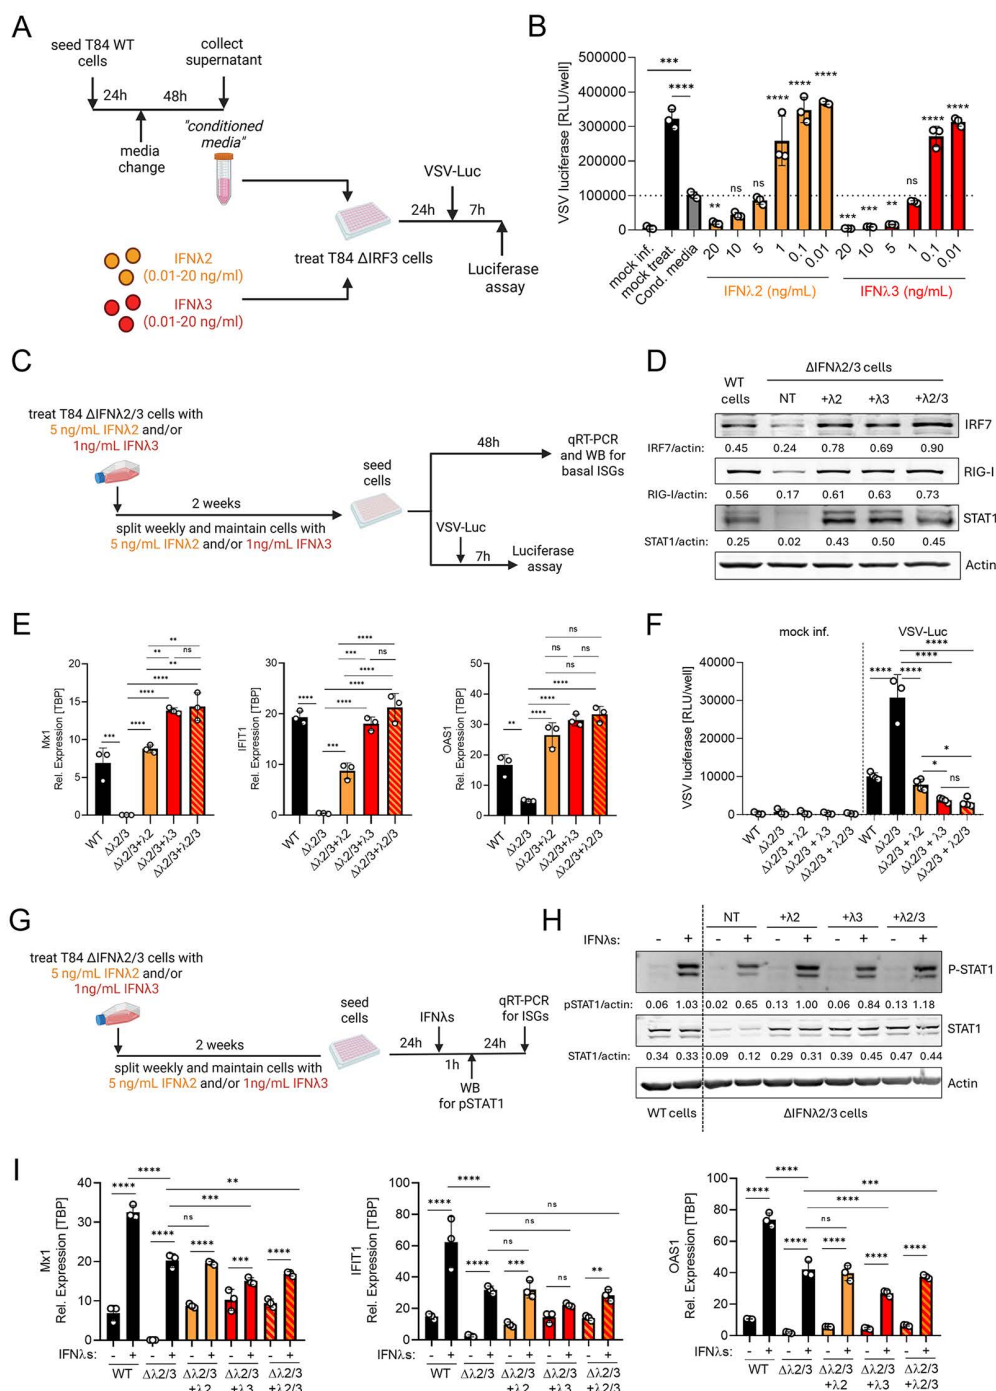

**Fig 10. Chronic IFNλ2 and/or IFNλ3 stimulation in T84 IFNλ2/3 KO cells restores basal ISG expression and antiviral activity.** (A, B) T84 WT cells were seeded, and media was replaced the following day. After 48h, supernatants (conditioned media) were collected and used as a reference control for antiviral activity. IRF3 KO cells were treated with recombinant IFNλ2 or IFNλ3 (0.01–20 ng/mL) or with WT conditioned media for 24h and then infected with VSV-Luc for 7h. (A) Schematic representation of the experimental workflow was created in BioRender Keser,Y. (2025) <https://BioRender.com/ip21074>. (B) 7hpi luciferase activity was measured to assess VSV-Luc infection in IRF3 KO cells treated with recombinant IFNλ2 or IFNλ3. (C–F) IFNλ2/3 KO cells were chronically supplemented for two weeks with IFNλ2 (5 ng/mL), IFNλ3 (1 ng/mL), or both. Cells were then trypsinized, reseeded in the absence of any IFN treatment and collected 48h later for ISG analysis, or used for antiviral assays. (C) Schematic representation of chronic IFNλ2/3 supplementation and subsequent experimental steps. Created in BioRender Keser,Y. (2025) <https://BioRender.com/3775duy>. (D) Western blot analysis of IRF7, RIG-I, and STAT1 in WT cells and IFNλ2/3 KO cells under the indicated supplementation conditions or non-treated (NT). Protein abundance

was quantified relative to actin. Representative images are shown. (E) qRT-PCR analysis of ISGs (MX1, IFIT1, OAS1) in WT cells and IFN $\lambda$ 2/3 cells maintained with IFN $\lambda$ 2, IFN $\lambda$ 3, IFN $\lambda$ 2 + 3, or non-treated. Relative expression was normalized to TBP. (F) VSV-Luc infection was measured by luciferase assayed 7 hpi in hours in WT and IFN $\lambda$ 2/3 cells maintained with IFN $\lambda$ 2, IFN $\lambda$ 3, IFN $\lambda$ 2 + 3, or non-treated. (G–I) IFN $\lambda$ 2/3 KO cells were chronically supplemented with IFN $\lambda$ 2 (5 ng/mL), IFN $\lambda$ 3 (1 ng/mL), or IFN $\lambda$ 2 + 3 for two weeks, reseeded in the absence of any IFNs, and next day, acutely stimulated with IFN $\lambda$ 1–3 (20 ng/mL of each) for 1 h or 24 h. (G) Schematic representation of chronic supplementation followed by acute IFN $\lambda$  stimulation, was created in BioRender Keser, Y. (2025) <https://BioRender.com/beodbxz>. (H) Western blot analysis of p-STAT1 and total STAT1 in WT and IFN $\lambda$ 2/3 cells maintained with IFN $\lambda$ 2, IFN $\lambda$ 3, IFN $\lambda$ 2 + 3, or non-treated (NT). Protein abundance was quantified relative to actin, loading control. Representative images are shown. (I) qRT-PCR analysis of ISGs (MX1, IFIT1, OAS1) 24 h after acute IFN $\lambda$ 1–3 stimulation in WT and  $\Delta$ IFN $\lambda$ 2/3 cells supplemented as indicated. Relative expression was normalized to TBP. Data represent  $n \geq 3$  biological replicates. Statistical significance was determined using two-way ANOVA ( $P < 0.05$  \*,  $P < 0.01$  \*\*,  $P < 0.001$  \*\*\*,  $P < 0.0001$  \*\*\*\*, ns = not significant). Error bars represent standard deviation, with the mean shown at the center.

<https://doi.org/10.1371/journal.ppat.1013857.g010>

cells, whereas IFN $\lambda$ 1-deficient cells maintain near-wild-type transcriptional signatures (Fig 5). This decreased ISG expression in the absence of basal IFN $\lambda$ 2/3 significantly increased susceptibility of intestinal epithelial cells to multiple viruses derived from diverse families (-ssRNA, dsRNA, and DNA viruses) (Fig 3). Importantly, basal IFN $\lambda$ 2/3 signaling maintains not only ISG expression but also the core machinery required for IFN induction and responsiveness, including IRF7, STAT1, STAT2, and IRF9 (Figs 5F and 6A, B). Consistent with this, IFN $\lambda$ 2/3-deficient cells display reduced total STAT1 levels and impaired responsiveness to exogenous IFN $\lambda$  (Fig 6C, 6D). Chronic supplementation of IFN $\lambda$ 2/3 knockout cells with low-dose recombinant IFN $\lambda$ 2 or IFN $\lambda$ 3 restored STAT1 expression and IFN responsiveness (Fig 10), underscoring the essential role of basal IFN $\lambda$ 2/3 in priming epithelial cells for robust antiviral signaling. Supernatant-transfer assays further confirmed that constitutively produced IFN $\lambda$ 2/3 drives basal STAT1 phosphorylation and ISG induction through paracrine signaling (Figs 7 and 9). Moreover, conditioned media lacking IFN $\lambda$ 2/3 failed to confer antiviral protection upon recipient cells, in contrast to conditioned media from wild-type or IFN $\lambda$ 1-deficient cultures (Figs 8 and 9). Together, these findings establish that constitutive IFN $\lambda$ 2/3 expression, rather than IFN $\lambda$ 1, is the principal mediator of basal JAK/STAT activation and ISG maintenance in intestinal epithelial cells (Fig 11). Our study provides one of the first detailed demonstrations of basal IFN $\lambda$  function in human epithelium and offers compelling evidence for distinct physiological roles of IFN $\lambda$ 1 versus IFN $\lambda$ 2/3.

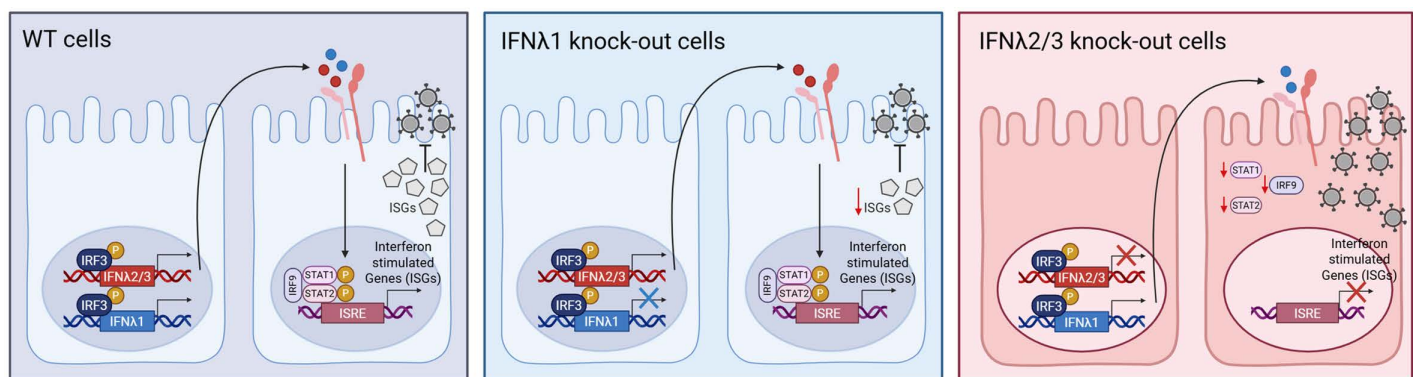

**Fig 11. Basal IFN $\lambda$ 2/3 are essential for maintaining ISG expression and antiviral protection in intestinal epithelial cells.** In WT cells (left panel), both IFN $\lambda$ 1 and IFN $\lambda$ 2/3 are produced under homeostatic conditions via IRF3 activation. Secreted IFN $\lambda$ s engage the IFNLR receptor on neighboring cells, activating the JAK/STAT pathway and inducing robust expression of ISGs thereby limiting viral replication. In IFN $\lambda$ 1 KO cells (middle panel), IFN $\lambda$ 2/3 are still expressed and can activate STAT1/2 signaling and ISG expression, maintaining effective antiviral defense with only a minor reduction in ISG levels. In contrast, IFN $\lambda$ 2/3 KO cells (right panel) retain IFN $\lambda$ 1 expression but exhibit a dramatic loss of STAT1/2 expression and fail to activate ISG transcription, resulting in impaired JAK/STAT signaling and increased viral replication. These findings highlight the predominant and non-redundant role of IFN $\lambda$ 2/3 in establishing and sustaining the basal antiviral state in intestinal epithelial cells. Schematics were created in BioRender Keser, Y. (2025) <https://BioRender.com/3oi4mf0>.

<https://doi.org/10.1371/journal.ppat.1013857.g011>



While we [6,38,39,45,55] and others [51,52,54,56] have detected basal IFN $\lambda$ s in mock-treated samples when evaluating virus infection, their functional significance has not been directly addressed. To date, no studies have thoroughly examined the role of basal IFN $\lambda$  expression in human epithelial cells or tissues where they are known to play a central role in antiviral defense. Here, we functionally characterize and differentiate basal IFN $\lambda$ 1 and IFN $\lambda$ 2/3 signaling for the first time by demonstrating a marked reduction in key ISG expression in the absence of basal IFN $\lambda$ 2 and IFN $\lambda$ 3, but not IFN $\lambda$ 1. Furthermore, we show that IFN $\lambda$ 2/3 KO cells exhibit diminished responsiveness to paracrine JAK/STAT signaling due to reduced expression of signaling effectors such as STAT1. Previous studies have similarly shown that type I interferons, particularly IFN $\beta$ , are constitutively produced at low levels in various cell types via IRF3/7-dependent mechanisms [57,58]. This constitutive IFN $\beta$  signaling maintains baseline ISG expression, enhancing antiviral preparedness through continuous expression of critical antiviral proteins (e.g., MX proteins, OAS enzymes, IFIT family members, RIG-I), while also regulating immune cell responsiveness, cellular metabolism, and tissue homeostasis [59,60]. Taken together, these findings underscore the essential role of basal IFNs in antiviral defense and responsiveness. Given the central role of IFN $\lambda$ s at mucosal barriers, dissecting the subtype-specific mechanisms of basal IFN $\lambda$  signaling is crucial to understanding their contribution to epithelial immune readiness.

Studies characterizing IFN $\lambda$  function have primarily focused on individual recombinant subtypes (IFN $\lambda$ 1, IFN $\lambda$ 2, IFN $\lambda$ 3 and IFN $\lambda$ 4), but direct comparisons across all IFN $\lambda$  subtypes remain critically lacking. Our findings reveal that recombinant IFN $\lambda$  subtypes show comparable antiviral activity against viruses from different families (Fig 2), yet, for the first time, we demonstrate a functional distinction between the antiviral roles of basal IFN $\lambda$ 1 and IFN $\lambda$ 2/3 in intestinal epithelial cells, with IFN $\lambda$ 2/3 playing a dominant, non-redundant role compared to basal IFN $\lambda$ 1 (Fig 8). Previously, we compared WT IFN $\lambda$ 3 with WT IFN $\lambda$ 4 and naturally occurring IFN $\lambda$ 4 variants (P70S and K154E), showing distinct levels of ISG induction and antiviral potency in human hepatocytes and intestinal cells [17]. Furthermore, other studies found differential antiviral activities of IFN $\lambda$ 1 and IFN $\lambda$ 3 against VSV and EMCV in hepatocytes, with IFN $\lambda$ 3 potentially restricting EMCV while IFN $\lambda$ 1 showed weak control, and conversely, IFN $\lambda$ 1 strongly inhibiting VSV whereas IFN $\lambda$ 3 had no effect [11]. These findings underscore that type III IFNs are not functionally equivalent, although the underlying mechanisms remain unclear. Notably, receptor binding studies have shown IFN $\lambda$ 3 has the highest affinity for the receptor complex, while IFN $\lambda$ 2 has the lowest [11,61,62], yet it remains unresolved whether receptor affinity alone accounts for differences in antiviral activity. A distinguishing feature of our study is the use of both recombinant IFN $\lambda$  treatment (paracrine signaling) and genetic knockout approaches to dissect subtype-specific roles of IFN $\lambda$ s. A key insight from our work is the discrepancy between the similar antiviral effects of recombinant IFNs and the divergent outcomes seen upon endogenous IFN $\lambda$  depletion. Treatment with recombinant IFNs introduces each IFN $\lambda$  subtype in a controlled and acute manner, often at non-physiological levels, thereby inducing a robust antiviral state. In contrast, genetic depletion of IFN $\lambda$  subtypes uniquely enabled evaluation of cell-intrinsic IFN $\lambda$  responses, including physiological consequences of receptor binding, thereby capturing differences in their endogenous functions. These findings highlight a critical limitation of relying solely on recombinant antiviral assays, which may not capture the complete antiviral functions of individual IFN $\lambda$  subtypes.

Our data suggest that basal IFN $\lambda$ 1 contributes minimally to the maintenance of basal antiviral immunity in intestinal epithelial cells, while IFN $\lambda$ 2/3 plays a dominant role (Figs 4–9). However, previous studies have shown that IFN $\lambda$ 1 and IFN $\lambda$ 3 are both crucial and exhibit virus-specific antiviral activities in hepatocytes [11]. This indicates that IFN $\lambda$ s may play more nuanced, tissue-specific functions that depend on both the site of infection and the dynamics of infection. Moreover, it raises the possibility that basal and virus-induced IFN $\lambda$  responses may serve distinct functions. The functional distinction of IFN $\lambda$ 1, IFN $\lambda$ 2, and IFN $\lambda$ 3 may stem from their evolutionary history. Unlike IFN $\lambda$ 2 and IFN $\lambda$ 3, which are conserved across a broad range of mammals, IFN $\lambda$ 1 shows more limited conservation and is functional primarily in primates. In several non-primate species, including mice, IFN $\lambda$ 1 is pseudogene and appears to have emerged later in evolution, likely through gene duplication and divergence events specific to primates [13,14]. This restricted phylogenetic distribution suggests that IFN $\lambda$ 1 may have evolved to serve more specialized roles in primates, potentially tailored to unique

host-pathogen interactions. Collectively, these findings support the idea that IFN $\lambda$  subtypes are not functionally equivalent and that their differences are highly context dependent. Further investigation is needed to elucidate the distinct antiviral mechanisms of each subtype. A deeper understanding of IFN $\lambda$  biology, particularly the distinct roles of basal versus virus-induced signaling, is essential for fully capturing the complexity of type III IFN antiviral activities and for guiding the therapeutic use of IFN $\lambda$ .

In conclusion, our study establishes that constitutive IFN $\lambda$ 2/3 expression, rather than IFN $\lambda$ 1, is the primary mediator of baseline antiviral immunity in the intestinal epithelial cells. This is achieved through the maintenance of basal JAK/STAT pathway activation, robust ISG expression, and the priming of cells for effective responses to viral challenges and to paracrine IFN signaling. These findings highlight a clear functional hierarchy among IFN $\lambda$  subtypes, positioning IFN $\lambda$ 2/3 as essential regulators of mucosal antiviral immunity and offering a foundational framework for developing targeted therapeutic strategies against enteric viral infections. Due to technical limitations, the phenotypes obtained through our genetic knockout approaches could not be verified in primary intestinal epithelial models or organoid cultures. We therefore acknowledge this as a limitation, and future studies will be needed to determine whether these basal IFN $\lambda$  phenotypes are preserved in primary systems. Future research should focus on understanding the precise mechanisms that lead to the differential basal activity of IFN $\lambda$ 1 versus IFN $\lambda$ 2/3 including investigating the specific transcriptional or post-transcriptional regulatory elements that govern their distinct contributions will be critical to understand their functions.

## Methods

### Cell lines and cell culture

Wild type (WT) T84 (ATCC CCL-248) as well as T84 knock-out (KO) cells were cultured in a 50:50 mixture of Dulbecco's Modified Eagle's Medium (DMEM) and F12 (Gibco #11320033). Lenti-X HEK293T cells (Takara, 632180) were grown in DMEM (Gibco #31965). All media was supplemented with 10% fetal bovine serum (FBS) (Sigma Aldrich #12306 C) and 100 U/mL penicillin and 100  $\mu$ g/mL streptomycin (Gibco #15140122). All cell lines were authenticated by STR profiling. All cell lines were tested for mycoplasma contamination biweekly by PCR on culture supernatants using DreamTaq DNA polymerase (5 U/ $\mu$ L, Cat# EP0701, Thermo Scientific) with the MW28 (5'-CCAGACTCCTACGGGAGGCA-3') and MW29 (5'-TGCGAGCATACTACTCAGGC-3') primers (50  $\mu$ M each), which amplify a ~500 bp product. PCR products were resolved on 2% agarose in 0.5 $\times$  TBE and visualized by ethidium bromide staining under UV light. T84 WT and KO cells were cultured on collagen coated surfaces. Plastic surfaces (*e.g.*, culturing flasks and multi-well plates) were coated with 0.01 mg/mL rat tail collagen (Sigma Aldrich #C7661) diluted in 60% EtOH for 1 hour at 37°C. Collagen was removed and surfaces were washed 2X in PBS prior to seeding cells. All cells were kept in a constant humid atmosphere at 37°C, 5% CO<sub>2</sub>, and 21% oxygen. For splitting, 0.25% Trypsin-EDTA (Gibco #25200056) was used for T84 cells which were split in a 1:2 ratio, and 0.05% Trypsin-EDTA (Gibco #25200054) was used for HEK293T which were split in a 1:10 ratio.

For all experiments, unless otherwise stated, cells were maintained at approximately 70–80% confluence. For chronic supplementation with IFN $\lambda$ 2 and/or IFN $\lambda$ 3, IFN $\lambda$ 2/3 KO cells were seeded in the presence of 5 ng/mL IFN $\lambda$ 2 (R&D Systems #1587IL025/CF) and 1 ng/mL IFN $\lambda$ 3 (R&D Systems #5259-IL-025/CF). The cytokine-containing media were refreshed every two days. Once per week, cells were passaged at a 1:3 ratio.

### Generation of T84 knock-out cell lines

T84 IFNLR KO [6], and IRF3 KO [58] cell lines were previously generated in our laboratory using CRISPR-Cas9 gene editing approach. The T84 IFN $\lambda$ 1 KO and IFN $\lambda$ 2/3 KO cell lines were generated using a lentivirus-based CRISPR-Cas9 gene editing approach. Briefly, single-guide RNAs (sgRNAs) targeting the coding region of IFN $\lambda$ 1, IFN $\lambda$ 2, and IFN $\lambda$ 3 were inserted into the BamHI cloning site of the lentiviral vector lentiCRISPR v2 (Addgene #52961), which originally contains a puromycin resistance gene. To generate vectors with blasticidin resistance for IFN $\lambda$ 2 and IFN $\lambda$ 3 targeting, the

puromycin resistance cassette was replaced with a blasticidin resistance gene using Gibson Assembly. The following sgRNAs were used: fw: 5'-CACC**GGGA**ACTC**ACCAAGGCGTCCC**-3', rev: 5'-AAAC**GGGACGCCTTGGTGAGTTCCC**-3' for IFN $\lambda$ 1, fw: 5'-CACC**GTGGGG**ACT**GCACGCCAGTGC**-3', rev: 5'-AAAC**GC**ACT**GGCGTG**CAGT**CCCCAC**-3' for IFN $\lambda$ 2, and fw: 5'-CACC**GCTGGAGCAGTTCCTGTGCGCC**-3', rev: 5'-AAAC**GGCGACAGGA**ACT**GCTCCAGC**-3' for IFN $\lambda$ 3 (gene targeting sequence in **bold**). To generate the lentiviruses, Lenti-X HEK293T cells seeded at 80% confluency in a 10 cm<sup>2</sup> dish were transfected using the transfection reagent Polyethylenimine (PEI) (Polysciences #23966–100) at a PEI:DNA ratio of 4:1. 8  $\mu$ g of the lentiCRISPR v2 containing the sgRNA targeting IFN $\lambda$ 1, IFN $\lambda$ 2, or IFN $\lambda$ 3, 4  $\mu$ g pMDG.2 plasmid (Addgene #12259), and 4  $\mu$ g psPAX (Addgene #12260) plasmid were used for the transfection of each 10 cm<sup>2</sup> dish. Three days post transfection, the supernatant was collected, spun down at 4000 rcf for 10 min, and filtered through a 0.45  $\mu$ m syringe filter (Lab Unlimited #W10462100). To pellet the lentiviruses, the supernatant was spun down at 125,000 rcf for 1.5 h using a SW40 Ti rotor. The lentivirus pellet was resuspended in 100  $\mu$ L of OptiMem (Gibco #31985062) (per 10 cm<sup>2</sup> dish of HEK293T cells). For the lentiviral transduction, 3x10<sup>5</sup> T84 WT cells were seeded per well of a 6-well plate. 16 hours post-seeding, cells were transduced with 20  $\mu$ L of the concentrated lentiviruses supplemented with 3  $\mu$ L Polybrene infection/transfection reagent (Sigma Aldrich #TR-1003-G) diluted in 3 mL of DMEM-F12 media. Three days post-transduction, transduced cells were selected with 0.1 mg/mL Puromycin (Invitrogen #ant-pr-1) or 0.1 mg/mL Blasticidin (Invitrogen #ant-bl-1). Single cell cloning was performed using a limited serial dilution approach in 96-well plate. KO of IFN $\lambda$ 1, IFN $\lambda$ 2, and IFN $\lambda$ 3 genes was confirmed by Sanger sequencing (see details below) ([S1A Fig](#)) and functional assays ([S1B](#), [S1C Fig](#)).

### Genomic DNA isolation, PCR, and gel extraction

T84 WT, IFN $\lambda$ 1 KO, and IFN $\lambda$ 2/3 KO cells were harvested, and genomic DNA (gDNA) was isolated by using Monarch Genomic DNA Purification Kits (NEB #T3010S) according to manufacturers' protocol. To amplify the genomic loci of IFN $\lambda$ 1, IFN $\lambda$ 2, and IFN $\lambda$ 3, PCR amplification was performed using 5X Phusion HF Buffer (Thermo Fisher #F-549S) and Phusion Hot Start II DNA Poly (Thermo Fisher #F518L) with the following primers: IFN $\lambda$ 1 fw: 5'-GTTGCGATTAGCCATGGCTGCAGCTTGGAC-3', IFN $\lambda$ 1 rev: 5'-AACTCAGCCCTATGTCTCAGTCAGGGCTGCA-3', or IFN $\lambda$ 2 and IFN $\lambda$ 3 fw: 5'-CTAGGTGAGTCCCACATCTCTGTCCGTGCTCAG-3', IFN $\lambda$ 2 rev: 5'-CCTGGAGGTGAGTTGGATTACACACAC-3' (same forward primer used for both), IFN $\lambda$ 3 rev: 5'-GCGACTGGGTGACAATAAATTAAGCCAAGTGGC-3'. The PCR products were subjected to electrophoresis on 1% Agarose (Sigma-Aldrich #A6013) in 1X TBE (1.1M Tris-base, 900mM Boric Acid, 25mM EDTA). Specific amplicon bands (IFN $\lambda$ 1: 2215 bp, IFN $\lambda$ 2: 1555 bp, IFN $\lambda$ 3: 1516 bp) were extracted using the Monarch DNA Gel Extraction Kit (NEB #T1020S). Extracted DNAs were sequenced using Sanger sequencing (GENEWIZ, Azenta Life Sciences).

### Viruses and viral infection

SA11 rotavirus encoding the green fluorescent protein UnaG fused to the NSP3 gene (RV-UnaG) was a kind gift from John Patton, Indian University, and was amplified and semi-purified as previously described [63]. Mammalian reovirus (MRV) type 3 clone 9, originally obtained from Bernard N. Fields, was propagated and purified following standard protocols [64]. Vaccinia virus expressing eGFP (VV-GFP), a Western Reserve strain with eGFP under the control of a synthetic early/late promoter, was first described by Mercer and Helenius [65] and was kindly provided by Jason Mercer. VV-GFP was grown and purified using standard methods [66]. Vesicular stomatitis virus expressing GFP (VSV-GFP) and luciferase (VSV-Luc) were generous gifts from Sean Whelan (Washington University) and was propagated as previously described [67].

For infection assays, all virus infections were performed at the multiplicities of infection (MOIs) indicated in figure legends. MRV, RV-UnaG, VSV-GFP, and VV-GFP infections were conducted by diluting virus stocks in complete culture

medium and incubating cells for the indicated durations. Prior to infection, rotavirus was activated at 37°C for 30 min in serum-free medium containing 2 µg/mL trypsin from bovine pancreas (Sigma #T1426). Cells were washed twice with serum-free medium before virus inoculation and subsequently incubated for 1 h at 37°C to facilitate infection.

### VSV-luciferase assay

T84 cells were seeded in 96-well plates at a density of 30,000 cells/well and allowed to adhere overnight. The following day, cells were infected with VSV expressing luciferase (VSV-Luc, MOI = 1) in serum-free media. At 7 hours post-infection (hpi), the media was removed, and cells were lysed using 100 µL of Passive Lysis Buffer (Promega #E1941). Luciferase activity was measured using the Bright-Glo Luciferase Assay System (Promega #E2610) according to the manufacturer's instructions. Briefly, 95 µL of cell lysate was transferred to a white-walled 96-well plate, followed by the addition of 95 µL of Luciferase Assay Reagent II. Luminescence was measured immediately using a luminometer (Tecan #33804).

### Poly I:C transfection

T84 cells were transfected with polyinosinic:polycytidylic acid (poly I:C) using Lipofectamine 2000 (Invitrogen #11668019). Cells were seeded in 48-well plates at a density of  $3 \times 10^5$  cells per well and allowed to reach ~80% confluency before transfection. For transfection, poly I:C (InvivoGen #tlrl-pic) was diluted in Opti-MEM (Gibco #31985070) to a final concentration of 1 µg/mL. Lipofectamine 2000 was separately diluted in Opti-MEM at a 1:25 dilution and incubated for 5 minutes at room temperature. The diluted poly I:C was then mixed with the diluted Lipofectamine 2000 at a 1:1 ratio and incubated for 20 minutes at room temperature to allow complex formation. The transfection mixture was added dropwise to cells and incubated for 6 hours at 37°C in 5% CO<sub>2</sub>.

### Neutralization of IFN-λ1, IFN-λ2, and IFN-λ3 in conditioned media

Basal levels of IFNλ1, IFNλ2, and IFNλ3 present in conditioned media were selectively depleted using the capture and detection antibodies provided in the corresponding DuoSet ELISA kits (R&D Systems, Bio-Techne # DY7246, #DY1587, #DY5259). For each interferon, neutralization was performed individually. Capture and detection antibodies were reconstituted according to the manufacturer's instructions and diluted 1:100 in conditioned media, and incubated at room temperatures for 1 hour, then immediately applied to recipient cells.

### RNA isolation, cDNA synthesis, and qRT-PCR

Total RNA was extracted using the RNeasy Mini Kit (Qiagen #74136) following the manufacturer's protocol. RNA concentration and purity were assessed using a NanoDrop spectrophotometer (Thermo Scientific). For cDNA synthesis, 250 ng of total RNA was reverse-transcribed in a 20 µL reaction using 4 µL 5x iScript Reaction Mix and 1 µL iScript Reverse Transcriptase (Bio-Rad #1708890) for RT-qPCR. The reverse transcription program was carried out as follows: 5 min at 25 °C (priming), 20 min at 46 °C (reverse transcription), 1 min at 95 °C (enzyme inactivation). Quantitative RT-PCR (qRT-PCR) was performed using iTaq Universal SYBR Green Supermix (Bio-Rad #1725124) in a 15 µL reaction volume containing: 7.5 µL SYBR Green Supermix, 3.8 µL each of forward and reverse primers diluted 1:100 (final concentration: 250 nM), 2 µL of cDNA diluted 1:2, 1.7 µL nuclease-free water.

qPCR reactions were carried out on the CFX Opus 96 Real-Time PCR System (Bio-Rad #12011319) with the following cycling conditions: 95 °C for 30 sec (initial denaturation), 40 cycles of: 95 °C for 5 sec (denaturation), 60 °C for 30 sec (annealing/extension), followed by a melt curve analysis to confirm specificity of amplification. The expression of target gene was normalized to the housekeeping gene TaTa box binding protein (TBP). Primer sequences are listed in [Table 1](#).



**Table 1. List of primer sequences used in qPCR.**

| Target Gene   | Forward sequence (5'→3') | Reverse sequence (5'→3') |
|---------------|--------------------------|--------------------------|
| Human IFIT1   | AAAAGCCCACATTTGAGGTG     | GAAATTCCTGAAACCGACCA     |
| Human IFNλ2/3 | GCCACATAGCCCAGTTCAAG     | TGGGAGAGGATATGGTGCAG     |
| Human IFNλ1   | GCAGGTTCAAATCTCTGTCACC   | AGCTCAGCCTCCAAGGCCACA    |
| Human IRF7    | TCTTCTTCCAAGAGCTGG       | CTATCCAGGGAAGACACAC      |
| Human ISG15   | CCTCTGAGCATCCTGGT        | AGGCCGTAATCCCCCAG        |
| Human Mx1     | GAGCTGTTCTCCTGCACCTC     | CTCCCACTCCCTGAAATCTG     |
| Human OAS1    | TGCGCTCAGCTTCGTACTGA     | GGTGGAGAACTCGCCCTCTT     |
| Human RIG-I   | TTGCAATATCCTCCACCACA     | GGCATGTTACACAGCTGACG     |
| Human TBP     | CCACTCACAGACTCTCACAAC    | CTGCGGTACAATCCCAGAAGT    |

<https://doi.org/10.1371/journal.ppat.1013857.t001>

## SDS-PAGE and western blot

Adherent cells were lysed in 1X RIPA buffer [150 mM NaCl, 50 mM Tris-HCl (pH 7.4), 1.0% Triton X-100, 0.5% sodium deoxycholate, and 0.1% SDS] supplemented with cOmplete Mini EDTA-free Protease Inhibitor Cocktail and phosphatase inhibitor PhosSTOP for 5 min at 37 °C. Lysates were collected and protein concentration was measured using the Pierce BCA Protein Assay Kit assay (Thermo Scientific #23225) according to the manufacturer's instructions. 5–10 µg protein per condition were separated by SDS-PAGE and blotted onto a 0.2 µm nitrocellulose membrane (Bio-Rad #1704158) using a Trans-Blot Turbo Transfer System (Bio-Rad). Membranes were blocked with Tris Buffer saline (TBS)-tween (0.5% Tween in TBS) containing 5% Bovine Serum Albumin (BSA) or containing 50% Intercept (TBS) Blocking Buffer (Licor #927–60001) for 1–2 h at room temperature (RT). Membranes were incubated with primary antibodies against IRF3 (Cell Signaling #11904T), Mx1 (Santa Cruz #sc-271024), IRF7 (Cell Signaling Technologies # 5184S), RIG-I (AdipoGen # AG-20B-0009), ISG15 (Santa Cruz #166755), STAT1 (BD Biosciences #610115), phospho-STAT1 (BD Biosciences #612233), and actin (Sigma Aldrich #A5441) diluted 1:1000 in blocking buffer overnight at 4°C. Anti-mouse-IgG (Abcam #ab6789) and anti-rabbit-IgG (Abcam #ab97051) antibodies coupled with horseradish peroxidase (HRP) (GE Healthcare #NA934V) or IRDye 680RD/800CW (Licor 926–68073/ 926–32210) were used as secondary antibodies. Membranes were washed three times with TBS-T for 5 min at RT after each step. The Pierce ECL Western Blotting Substrate (Thermo Fisher #32209) was used for detection of HRP conjugated antibodies according to manufacturer instructions. The membranes were imaged with the ImageQuant LAS 4000 (GE Healthcare) or Odyssey M imaging system (Licor). Quantification was done using the open image analysis software ImageJ. Relative abundance of target protein was normalized to the loading control housekeeping protein, actin.

## Enzyme-linked immunosorbent assay (ELISA)

The levels of IFNλ1 and IFNλ2/3 in cell culture supernatants were measured using the Human IL-29/IFN-lambda 1 DuoSet ELISA (biotechne rd systems # DY7246) and DIY Human IFN-Lambda 2/3 (IL-28A/B) ELISA (pbl assay science #61830) kit, following the manufacturer's protocol. Briefly, half-area high-binding 96-well plates (Fisher #07000091) were coated with the capture antibody overnight at 4°C. After blocking with assay buffer, samples and standards were added in duplicate and incubated at room temperature. Following extensive washing, the detection antibody was applied, followed by incubation with streptavidin-HRP. Signal development was carried out using the substrate solution (BD Biosciences # 555214), and absorbance was measured at 450 nm using a microplate reader (BioTek #BT800TS). IFNλ1 and IFNλ2/3 concentrations were determined by interpolating sample absorbance values from a standard curve generated using recombinant IFNλ1 and IFNλ2.

### Indirect immunofluorescence staining

MRV infected cells were washed with PBS and fixed in 2% Paraformaldehyde (PFA) (Roth #0335.3) (diluted in PBS) for 20 min at RT. Cells were washed in PBS three times and permeabilized in 0.5% Triton-X100 (Sigma-Aldrich #X100-500ML) diluted in PBS for 15 mins at RT. Cells were blocked using 10% FBS (Sigma Aldrich #12306 C) in PBS for 30 min at RT. Primary antibody against MRV  $\mu$ NS [55] diluted in 10% FBS (in PBS) and incubated for 1 h at RT. Cells were incubated with Alexa Fluor 488 conjugated secondary antibody with DAPI (Invitrogen #P36941), both diluted in 1% BSA in PBS for 1 h at RT. Cells were washed in PBS three times after each step. Samples were imaged on a ZEISS Celldiscoverer 7.

### Fluorescence imaging and image analysis

Live-cell imaging of cells was acquired using the epifluorescent ZEISS Celldiscoverer-7 (CD7) Widefield microscope. To assess viral infection in real time, live-cell microscopy was performed. T84 WT, IFN $\lambda$ 1 KO, and IFN $\lambda$ 2/3 KO cells were seeded in 48-well plates and infected with RV-UnaG, VSV-GFP, or VV-GFP. At the experimental endpoint, cells were washed with culture medium and incubated with Hoechst nuclear dye for 30 minutes at 37°C and 5% CO<sub>2</sub>. Cells were then imaged immediately using live-cell microscopy. To monitor viral infection dynamics in real-time, live-cell fluorescence microscopy was performed. T84 WT, IFN $\lambda$ 1 KO, and IFN $\lambda$ 2/3 KO cells were seeded in 48-well plates and maintained at 37°C with 5% CO<sub>2</sub> throughout the entire imaging procedure. Cells were infected with RV-UnaG, VSV-GFP, or VV-GFP and imaged every 30 minutes over a 48-hour period using live-cell microscopy. Images were acquired using a 20 $\times$  objective with 0.5 $\times$  optical zoom. The laser was set to 50% intensity, and images were captured with a 200 ms exposure time for AF488 channel (for virus). Mean fluorescence intensity (MFI) of GFP and UnaG was quantified using ImageJ Fiji, and MFI values were plotted against time to assess viral replication kinetics.

### Cytotoxicity assay

Cytotoxicity was evaluated using the LDH-Glo Cytotoxicity Assay (Promega #J2380) according to the manufacturer's instructions. T84 WT and KO cells were seeded in 96-well plates and cytotoxicity assays were performed two days later. As a positive control for cytotoxicity, T84 WT cell treated with PPMP (50  $\mu$ M; D-threo-1-Phenyl-2-hexadecanoylamino-3-morpholino-1-propanol hydrochloride) (Cayman Chemicals #17236) was included. At the indicated time points, 50  $\mu$ L of culture supernatant was transferred to a clear, flat-bottom 96-well plate to measure extracellular (released) LDH. To quantify intracellular LDH, 15  $\mu$ L of 10 $\times$  Lysis Buffer was added to the remaining cells in the original wells, followed by a 1-hour incubation at 37°C. Subsequently, 50  $\mu$ L of the resulting lysate was transferred to a separate 96-well plate. For both supernatant and lysate samples, 50  $\mu$ L of LDH Substrate Mix was added, mixed gently, and incubated for 30 minutes at room temperature in the dark. The reaction was terminated by adding 50  $\mu$ L of Stop Solution to each well. Luminescence was recorded at 490 nm using an 800TS Microplate Reader (BioTek). Cytotoxicity was calculated by normalizing the amount of released LDH to the total intracellular LDH.

### Bulk RNA-sequencing

T84 WT, IFN $\lambda$ 1 KO, IFN $\lambda$ 2/3 KO, and IFNLR KO cells were seeded in a 48-well plate. For each cell line, three biological replicates were prepared. RNA extraction was performed using the Qiagen RNeasy Plus Mini Kit following the manufacturer's instruction. RNA sequencing was performed by GENEWIZ (Azenta Life Sciences). Briefly, cDNA libraries were prepared using the TruSeq Stranded mRNA Library Prep Kit (Illumina) and sequenced on an Illumina NovaSeq 6000 platform, generating 150 bp paired-end reads. Data preprocessing together with quality control report (FAST QC Report) was provided by Genewiz. The quality control of raw sequencing reads was checked using FastQC to ensure high-quality sequencing data. Low-quality reads and adapter sequences were trimmed using Trimmomatic. The cleaned reads were

then aligned to the human reference genome (GRCh38) using STAR aligner. Gene expression levels were quantified using featureCounts, and differential gene expression analysis was conducted with DESeq2. Genes with an adjusted  $p$ -value  $< 0.05$  and a fold change  $\geq 2$  were considered significantly differentially expressed. Gene Ontology (GO) enrichment analysis was performed on the differentially expressed genes using the clusterProfiler package in R.

### Data plotting and statistics

If not specified otherwise, data plotting and all statistical analyses were performed with the GraphPad Prism 5.0 software. The number of biological replicates and statistical tests used are specified in the figure legends. Statistical tests are listed in figure legends. If not specified otherwise, all schematics and illustrations were created with BioRender.com. All figures were assembled with the Affinity Designer 1.10.0 software.

### Supporting information

**S1 Fig. Validation of T84 IFN $\lambda$ 1 KO and IFN $\lambda$ 2/3 KO cells.** (A) Genomic DNA (gDNA) from T84 WT, IFN $\lambda$ 1 KO, and IFN $\lambda$ 2/3 KO cells were isolated, and PCR was performed for the amplification of IFN $\lambda$ 1, IFN $\lambda$ 2, and IFN $\lambda$ 3 loci. PCR products were sequenced by Sanger sequencing. The Basic Local Alignment Search Tool (BLAST) was used to compare the sequences. (B,C). T84 WT, IFN $\lambda$ 1 KO, and IFN $\lambda$ 2/3 KO cells were seeded in 48-well plates and transfected with poly I:C for 6 hours. Cell supernatants were collected and analyzed by ELISA to measure (B) IFN $\lambda$ 1 and (C) IFN $\lambda$ 2/3 protein levels. Data represent  $n \geq 3$  biological replicates. Statistical significance was determined using two-way ANOVA ( $P < 0.0001$  \*\*\*\*, ns = not significant). Error bars represent standard deviation with the mean as the center. (TIF)

**S2 Fig. Genetic depletion of IFN $\lambda$ 2/3, but not IFN $\lambda$ 1, increases the spread of diverse virus types in intestinal epithelial cells.** T84 WT, IFN $\lambda$ 1 KO, and IFN $\lambda$ 2/3 KO cells were seeded in 96-well plates and infected two days later with (A) VSV-GFP, (B) RV-UnaG, and (C) VV-GFP. Viral spread was monitored using live-cell microscopy every 2 hours for 48 hours. (left) Representative brightfield (gray) and fluorescence images show infection (green) at 0, 12, 24, 36, and 48 hpi. Representative images shown. Scale bar = 250  $\mu$ m. (right) Mean fluorescence intensity over time per field of view was quantified using ImageJ Fiji. Data represent  $n \geq 3$  biological replicates. Statistical significance was determined using two-way ANOVA ( $P < 0.0001$  \*\*\*\*, ns = not significant). Error bars represent standard deviation with the mean as the center. (TIF)

**S3 Fig. T84 polyclonal IFN $\lambda$ 2/3 KO cells, but not IFN $\lambda$ 1 polyclonal cells, showed enhanced infection by VSV-GFP and RV-UnaG.** (A-C) T84 WT, IFN $\lambda$ 1 KO polyclonal (pc.), and IFN $\lambda$ 2/3 KO polyclonal cells (pc.) were seeded in 48-well plates, and next day, transfected with poly I:C for 6 hours. Cell supernatants were collected and analyzed by ELISA to measure (A) IFN $\lambda$ 1; (B) IFN $\lambda$ 2; (C) IFN $\lambda$ 3 protein levels. (D-G) T84 WT, IFN $\lambda$ 1 KO polyclonal (pc.), and IFN $\lambda$ 2/3 KO polyclonal (pc.) cells were seeded in 48-well plates. The following day, cells were infected with (D, E) VSV-GFP (MOI = 1) for 7 hours and (F, G) RV-UnaG (MOI = 1) for 16 hours. Nuclei were stained with Hoechst (blue), and infected cells are shown in green. (D, F) Representative images and (E, G) corresponding quantification (right) are shown for each virus. Scale bar = 100  $\mu$ m. Data represent  $\geq 3$  independent biological replicates. Statistical significance was determined by one-way ANOVA (\* $P < 0.05$ , \*\*\* $P < 0.001$ , \*\*\*\* $P < 0.0001$ , ns = not significant). Error bars represent standard deviation with the mean as the center. (TIF)

**S4 Fig. Type III IFN signaling plays a more dominant role in controlling virus infection compared to type I IFN signaling in T84 cells.** T84 WT, IFNAR KO, and IFNLR KO cells were seeded in 48-well plates and infected the following day. (A-D) Cells were infected with MOI (=1) (A) VSV-GFP for 7 hours, (B) RV-UnaG for 16 hours and (C) VV-GFP for 16

hours by live-cell microscopy. Nuclei were stained with Hoechst (blue), and infected cells are shown in green. (A) Representative images and (B-D) corresponding quantification are shown for each virus. Scale bar = 100  $\mu$ m. Data represent  $\geq 3$  independent biological replicates. Statistical significance was determined by two-way ANOVA (\* $P < 0.05$ , \*\*\* $P < 0.001$ , \*\*\*\* $P < 0.0001$ , ns = not significant). Error bars represent standard deviation with the mean as the center.

(TIF)

**S5 Fig. T84 WT and KO cells do not show differences in apoptosis or cell viability.** (A-C) Based on RNA-sequencing data, Gene Set Enrichment Analysis (GSEA) was performed on selected GO biological process terms associated with IFN response (blue), cytotoxicity (purple), and apoptotic pathways (orange). (A) Comparison of WT vs. IFNLR KO cells. (B) Comparison of WT vs. IFN $\lambda$ 2/3 KO cells. (C) Comparison of WT vs. IFN $\lambda$ 1 KO cells. (D) Cytotoxicity was assessed by measuring LDH release in WT, IFN $\lambda$ 1 KO, IFN $\lambda$ 2/3 KO and IFNLR KO cells. Positive control (pos. ctrl.) indicates cells treated with 50  $\mu$ M PPMP to induce cytotoxicity.  $n \geq 3$  biological replicates. Statistical analysis was performed using ordinary one-way ANOVA. ( $P < 0.0001$  \*\*\*\*, ns = not significant). Error bars represent standard deviation with the mean as the center.

(TIF)

**S6 Fig. Basal ISG expression is significantly reduced in IFN $\lambda$ 2/3 KO polyclonal cells.** (A–D) qRT-PCR analysis of ISGs (Mx1, IFIT1, Viperin, and ISG15) in T84 WT cells, IFN $\lambda$ 1 KO polyclonal cells (pc.), and IFN $\lambda$ 2/3 KO polyclonal cells (pc.) at two days post-seeding. Relative expression was normalized to TBP. Data represent  $n \geq 3$  biological replicates. Statistical significance was determined using one-way ANOVA with multiple comparisons ( $P < 0.05$  \*, ns = not significant). Error bars represent standard deviation with the mean shown at the center.

(TIF)

**S7 Fig. Expression of housekeeping gene TBP and ISGs across cell lines based on RNA-seq data.** Expression levels of selected housekeeping gene (TBP) and ISGs (IFIT1, ISG15, MX1, OAS1) were analyzed across WT and KO cell lines using RNA-sequencing data. Each point represents an individual biological replicate. Expression levels are presented as normalized raw counts.

(TIF)

**S8 Fig. Validation of T84 IRF3 KO cells.** (A, B) T84 WT and IRF3 KO cells were seeded and harvested two days post-seeding to assess IRF3 expression. (A) IRF3 protein levels were analyzed by Western blot, with actin used as a loading control. Representative images shown. (B) Basal IFN $\lambda$ 1 and IFN $\lambda$ 2/3 expression levels were quantified by qRT-PCR in T84 WT and IRF3 KO cells. (C) T84 WT and IRF3 KO cells were seeded and infected with MRV the following day. MRV infection was assessed by immunostaining against the MRV  $\mu$ NS protein at 16 hpi. Representative images show nuclei (blue) and MRV-infected cells (green). Scale bar = 100  $\mu$ m. (D) Same as C except MRV-induced IFN $\lambda$ 1 and IFN $\lambda$ 2/3 expression was quantified by qRT-PCR in T84 WT and IRF3 KO cells. Gene expression levels were normalized to TBP. Data represent  $n \geq 3$  biological replicates. Statistical significance was determined using (B) an unpaired t-test between WT and IRF3 KO cells and (D) by two-way ANOVA ( $P < 0.01$  \*\*,  $P < 0.0001$  \*\*\*\*, ns = not significant). Error bars represent standard deviation with the mean as the center.

(TIF)

**S9 Fig. Basal signaling in T84 cells is mainly mediated by IFN $\lambda$  signaling, not type I IFN signaling.** (A–B) T84 WT cells were seeded, and the media was changed the following day. Two days later, the cell supernatant was collected (referred to as conditioned media, CM) and used to treat T84 IFNLR KO cells (deficient in IFN $\lambda$  signaling) and IFNAR KO cells (deficient in type I IFN signaling). Cells treated with culture media (DMEM-F12) served as controls. IFNLR KO cells were additionally pre-treated with recombinant IFN $\lambda$ 1–3 (100 ng/mL each) and IFNAR KO cells were additionally - pre-treated with recombinant IFN $\beta$  (2000 IU/mL) for 24 hours prior infection as controls. (A) qRT-PCR analysis of the ISG Mx1



at 24 h post-treatment in IFNLR KO and IFNAR KO cells following CM exposure. Relative expression was normalized to TBP. (B) Following 24 h treatment with CM, cells were infected with VSV-Luc (MOI = 1). At 6 hpi, luciferase assays were performed to assess viral replication. Data represent  $n \geq 3$  biological replicates. Statistical significance was determined using two-way ANOVA ( $P < 0.01$  \*\*,  $P < 0.0001$  \*\*\*\*, ns = not significant). Error bars represent standard deviation with the mean shown at the center.

(TIF)

**S10 Fig. Specificity of neutralizing antibodies against individual IFN $\lambda$  subtypes.** Recombinant IFN $\lambda$ 1, IFN $\lambda$ 2, or IFN $\lambda$ 3 (10 ng/mL each) was prepared in 250  $\mu$ L of DMEM-F12 culture media containing 2.5  $\mu$ L of the corresponding capture antibody and 2.5  $\mu$ L of the corresponding detection antibody. Mixtures were incubated for 1 hour at room temperature and then immediately applied to T84 WT cells for 1 hour. Cells were harvested, and Western blot analysis of p-STAT1 was performed. Actin was used as a loading control. Representative images are shown.

(TIF)

## Acknowledgments

We would like to thank the Boulant and Stanifer lab members for the constructive discussions and for proofreading this manuscript.

## Author contributions

**Conceptualization:** Yagmur Keser, Steeve Boulant, Megan L. Stanifer.

**Data curation:** Yagmur Keser, Zehra Sena Bumi, Amelia Perez Valiente, Sorin O. Jacobs.

**Formal analysis:** Yagmur Keser.

**Funding acquisition:** Steeve Boulant, Megan L. Stanifer.

**Investigation:** Yagmur Keser, Zehra Sena Bumi, Amelia Perez Valiente, Sorin O. Jacobs.

**Methodology:** Yagmur Keser.

**Project administration:** Steeve Boulant, Megan L. Stanifer.

**Supervision:** Steeve Boulant, Megan L. Stanifer.

**Visualization:** Megan L. Stanifer.

**Writing – original draft:** Yagmur Keser, Steeve Boulant, Megan L. Stanifer.

**Writing – review & editing:** Yagmur Keser, Steeve Boulant, Megan L. Stanifer.

## References

1. Kawai T, Akira S. Innate immune recognition of viral infection. *Nat Immunol*. 2006;7(2):131–7. <https://doi.org/10.1038/ni1303> PMID: 16424890
2. Koyama S, Ishii KJ, Coban C, Akira S. Innate immune response to viral infection. *Cytokine*. 2008;43(3):336–41. <https://doi.org/10.1016/j.cyt.2008.07.009> PMID: 18694646
3. Hoffmann H-H, Schneider WM, Rice CM. Interferons and viruses: an evolutionary arms race of molecular interactions. *Trends in Immunology*. 2015;36(3):124–38. <https://doi.org/10.1016/j.it.2015.01.004>
4. Kotenko SV, Gallagher G, Baurin VV, Lewis-Antes A, Shen M, Shah NK, et al. IFN- $\lambda$ s mediate antiviral protection through a distinct class II cytokine receptor complex. *Nat Immunol*. 2002;4(1):69–77. <https://doi.org/10.1038/ni875>
5. Sheppard P, Kindsvogel W, Xu W, Henderson K, Schlutsmeyer S, Whitmore TE, et al. IL-28, IL-29 and their class II cytokine receptor IL-28R. *Nat Immunol*. 2002;4(1):63–8. <https://doi.org/10.1038/ni873>
6. Pervolaraki K, Stanifer ML, Münchau S, Renn LA, Albrecht D, Kurzhals S, et al. Type I and Type III Interferons Display Different Dependency on Mitogen-Activated Protein Kinases to Mount an Antiviral State in the Human Gut. *Front Immunol*. 2017;8:459. <https://doi.org/10.3389/fimmu.2017.00459> PMID: 28484457

7. Stanifer ML, Pervolaraki K, Boulant S. Differential Regulation of Type I and Type III Interferon Signaling. *Int J Mol Sci.* 2019;20(6):1445. <https://doi.org/10.3390/ijms20061445> PMID: [30901970](#)
8. Stanifer ML, Pervolaraki K, Boulant S. Differential Regulation of Type I and Type III Interferon Signaling. *Int J Mol Sci.* 2019;20(6):1445. <https://doi.org/10.3390/ijms20061445> PMID: [30901970](#)
9. Sommereyns C, Paul S, Staeheli P, Michiels T. IFN-lambda (IFN-lambda) is expressed in a tissue-dependent fashion and primarily acts on epithelial cells in vivo. *PLoS Pathog.* 2008;4(3):e1000017. <https://doi.org/10.1371/journal.ppat.1000017> PMID: [18369468](#)
10. Mordstein M, Neugebauer E, Ditt V, Jessen B, Rieger T, Falcone V, et al. Lambda interferon renders epithelial cells of the respiratory and gastrointestinal tracts resistant to viral infections. *J Virol.* 2010;84(11):5670–7. <https://doi.org/10.1128/JVI.00272-10> PMID: [20335250](#)
11. Dellgren C, Gad HH, Hamming OJ, Melchjorsen J, Hartmann R. Human interferon-lambda3 is a potent member of the type III interferon family. *Genes Immun.* 2009;10(2):125–31. <https://doi.org/10.1038/gene.2008.87> PMID: [18987645](#)
12. Lasfar A, Lewis-Antes A, Smirnov SV, Anantha S, Abushahba W, Tian B, et al. Characterization of the mouse IFN-lambda ligand-receptor system: IFN-lambdas exhibit antitumor activity against B16 melanoma. *Cancer Res.* 2006;66(8):4468–77. <https://doi.org/10.1158/0008-5472.CAN-05-3653> PMID: [16618774](#)
13. Hemann EA, Gale M Jr, Savan R. Interferon Lambda Genetics and Biology in Regulation of Viral Control. *Front Immunol.* 2017;8:1707. <https://doi.org/10.3389/fimmu.2017.01707> PMID: [29270173](#)
14. Fox BA, Sheppard PO, O'Hara PJ. The role of genomic data in the discovery, annotation and evolutionary interpretation of the interferon-lambda family. *PLoS One.* 2009;4(3):e4933. <https://doi.org/10.1371/journal.pone.0004933> PMID: [19300512](#)
15. Prokunina-Olsson L, Muchmore B, Tang W, Pfeiffer RM, Park H, Dickensheets H, et al. A variant upstream of IFNL3 (IL28B) creating a new interferon gene IFNL4 is associated with impaired clearance of hepatitis C virus. *Nat Genet.* 2013;45(2):164–71. <https://doi.org/10.1038/ng.2521>
16. Guo C, Reuss D, Coey JD, Sukumar S, Lang B, McLauchlan J, et al. Conserved Induction of Distinct Antiviral Signalling Kinetics by Primate Interferon Lambda 4 Proteins. *Front Immunol.* 2021;12. <https://doi.org/10.3389/fimmu.2021.772588>
17. Bolen CR, Ding S, Robek MD, Kleinstein SH. Dynamic expression profiling of type I and type III interferon-stimulated hepatocytes reveals a stable hierarchy of gene expression. *Hepatology.* 2014;59(4):1262–72. <https://doi.org/10.1002/hep.26657> PMID: [23929627](#)
18. Dalskov L, Gad HH, Hartmann R. Viral recognition and the antiviral interferon response. *EMBO J.* 2023;42(14):e112907. <https://doi.org/10.15252/embj.2022112907> PMID: [37367474](#)
19. Odendall C, Kagan JC. The unique regulation and functions of type III interferons in antiviral immunity. *Curr Opin Virol.* 2015;12:47–52. <https://doi.org/10.1016/j.coviro.2015.02.003> PMID: [25771505](#)
20. Liu S, Cai X, Wu J, Cong Q, Chen X, Li T, et al. Phosphorylation of innate immune adaptor proteins MAVS, STING, and TRIF induces IRF3 activation. *Science.* 2015;347(6227):aaa2630. <https://doi.org/10.1126/science.aaa2630> PMID: [25636800](#)
21. Kato H, Takeuchi O, Sato S, Yoneyama M, Yamamoto M, Matsui K, et al. Differential roles of MDA5 and RIG-I helicases in the recognition of RNA viruses. *Nature.* 2006;441(7089):101–5. <https://doi.org/10.1038/nature04734> PMID: [16625202](#)
22. Takeda K, Akira S. Toll-like receptors in innate immunity. *Int Immunol.* 2005;17(1):1–14. <https://doi.org/10.1093/intimm/dxh186> PMID: [15585605](#)
23. Sun L, Wu J, Du F, Chen X, Chen ZJ. Cyclic GMP-AMP synthase is a cytosolic DNA sensor that activates the type I interferon pathway. *Science.* 2013;339(6121):786–91. <https://doi.org/10.1126/science.1232458> PMID: [23258413](#)
24. Li Q, Wu P, Du Q, Hanif U, Hu H, Li K. cGAS–STING, an important signaling pathway in diseases and their therapy. *MedComm.* 2024;5(4). <https://doi.org/10.1002/mco2.511>
25. Rehwinkel J, Gack MU. RIG-I-like receptors: their regulation and roles in RNA sensing. *Nat Rev Immunol.* 2020;20(9):537–51. <https://doi.org/10.1038/s41577-020-0288-3>
26. Al Hamrashdi M, Brady G. Regulation of IRF3 activation in human antiviral signaling pathways. *Biochem Pharmacol.* 2022;200:115026. <https://doi.org/10.1016/j.bcp.2022.115026> PMID: [35367198](#)
27. Schindler C, Levy DE, Decker T. JAK-STAT signaling: from interferons to cytokines. *J Biol Chem.* 2007;282(28):20059–63. <https://doi.org/10.1074/jbc.R700016200> PMID: [17502367](#)
28. Tovey MG, Streuli M, Gresser I, Gugenheim J, Blanchard B, Guymarho J, et al. Interferon messenger RNA is produced constitutively in the organs of normal individuals. *Proc Natl Acad Sci USA.* 1987;84(14):5038–42. <https://doi.org/10.1073/pnas.84.14.5038>
29. Gough DJ, Messina NL, Clarke CJP, Johnstone RW, Levy DE. Constitutive type I interferon modulates homeostatic balance through tonic signaling. *Immunity.* 2012;36(2):166–74. <https://doi.org/10.1016/j.immuni.2012.01.011> PMID: [22365663](#)
30. Essers MAG, Offner S, Blanco-Bose WE, Waibler Z, Kalinke U, Duchosal MA, et al. IFNalpha activates dormant haematopoietic stem cells in vivo. *Nature.* 2009;458(7240):904–8. <https://doi.org/10.1038/nature07815> PMID: [19212321](#)
31. Ganai SC, Sanos SL, Kallfass C, Oberle K, Johner C, Kirschning C, et al. Priming of natural killer cells by nonmucosal mononuclear phagocytes requires instructive signals from commensal microbiota. *Immunity.* 2012;37(1):171–86. <https://doi.org/10.1016/j.immuni.2012.05.020> PMID: [22749822](#)
32. Deng Z, Ng C, Inoue K, Chen Z, Xia Y, Hu X, et al. Def6 regulates endogenous type-I interferon responses in osteoblasts and suppresses osteogenesis. *Elife.* 2020;9:e59659. <https://doi.org/10.7554/eLife.59659> PMID: [33373293](#)

33. Fleetwood AJ, Dinh H, Cook AD, Hertzog PJ, Hamilton JA. GM-CSF- and M-CSF-dependent macrophage phenotypes display differential dependence on type I interferon signaling. *J Leukoc Biol*. 2009;86(2):411–21. <https://doi.org/10.1189/jlb.1108702> PMID: [19406830](#)
34. Gough DJ, Messina NL, Hii L, Gould JA, Sabapathy K, Robertson APS, et al. Functional crosstalk between type I and II interferon through the regulated expression of STAT1. *PLoS Biol*. 2010;8(4):e1000361. <https://doi.org/10.1371/journal.pbio.1000361> PMID: [20436908](#)
35. Thomas KE, Galligan CL, Newman RD, Fish EN, Vogel SN. Contribution of interferon-beta to the murine macrophage response to the toll-like receptor 4 agonist, lipopolysaccharide. *J Biol Chem*. 2006;281(41):31119–30. <https://doi.org/10.1074/jbc.M604958200> PMID: [16912041](#)
36. Keser Y, C. M.-Z., Uckelely ZM, Reuss D, Doldan P, Ramsden JM, et al. Basal IFN $\lambda$ 2/3 expression regulates tight junction formation in human epithelial cells. *EMBO J*. 2025.
37. Baldridge MT, Lee S, Brown JJ, McAllister N, Urbanek K, Dermody TS, et al. Expression of Ifnlr1 on Intestinal Epithelial Cells Is Critical to the Antiviral Effects of Interferon Lambda against Norovirus and Reovirus. *J Virol*. 2017;91(7):e02079-16. <https://doi.org/10.1128/JVI.02079-16> PMID: [28077655](#)
38. Karlowitz R, Stanifer ML, Roedig J, Andrieux G, Bojkova D, Bechtel M, et al. USP22 controls type III interferon signaling and SARS-CoV-2 infection through activation of STING. *Cell Death Dis*. 2022;13(8). <https://doi.org/10.1038/s41419-022-05124-w>
39. Stanifer ML, Kee C, Cortese M, Zumaran CM, Triana S, Muekenhahn M, et al. Critical Role of Type III Interferon in Controlling SARS-CoV-2 Infection in Human Intestinal Epithelial Cells. *Cell Rep*. 2020;32(1):107863. <https://doi.org/10.1016/j.celrep.2020.107863> PMID: [32610043](#)
40. Pott J, Mahlaköiv T, Mordstein M, Duerr CU, Michiels T, Stockinger S, et al. IFN-lambda determines the intestinal epithelial antiviral host defense. *Proc Natl Acad Sci U S A*. 2011;108(19):7944–9. <https://doi.org/10.1073/pnas.1100552108> PMID: [21518880](#)
41. Peterson ST, Kennedy EA, Brigleb PH, Taylor GM, Urbanek K, Bricker TL, et al. Disruption of Type III Interferon (IFN) Genes Ifnl2 and Ifnl3 Recapitulates Loss of the Type III IFN Receptor in the Mucosal Antiviral Response. *J Virol*. 2019;93(22). <https://doi.org/10.1128/jvi.01073-19>
42. Doldan P, Dai J, Metz-Zumaran C, Patton JT, Stanifer ML, Boulant S. Type III and Not Type I Interferons Efficiently Prevent the Spread of Rotavirus in Human Intestinal Epithelial Cells. *J Virol*. 2022;96(17):e0070622. <https://doi.org/10.1128/jvi.00706-22> PMID: [36000839](#)
43. Nice TJ, Baldridge MT, McCune BT, Norman JM, Lazear HM, Artyomov M, et al. Interferon- $\lambda$  cures persistent murine norovirus infection in the absence of adaptive immunity. *Science*. 2015;347(6219):269–73. <https://doi.org/10.1126/science.1258100> PMID: [25431489](#)
44. Baldridge MT, Nice TJ, McCune BT, Yokoyama CC, Kambal A, Wheadon M, et al. Commensal microbes and interferon- $\lambda$  determine persistence of enteric murine norovirus infection. *Science*. 2015;347(6219):266–9. <https://doi.org/10.1126/science.1258025> PMID: [25431490](#)
45. Pervolaraki K, Rastgou Talemi S, Albrecht D, Bormann F, Bamford C, Mendoza JL, et al. Differential induction of interferon stimulated genes between type I and type III interferons is independent of interferon receptor abundance. *PLoS Pathog*. 2018;14(11):e1007420. <https://doi.org/10.1371/journal.ppat.1007420> PMID: [30485383](#)
46. Kramer MJ, Dennin R, Kramer C, Jones G, Connell E, Rolon N, et al. Cell and Virus Sensitivity Studies with Recombinant Human Alpha Interferons. *Journal of Interferon Research*. 1983;3(4):425–35. <https://doi.org/10.1089/jir.1983.3.425>
47. Vogel SN, Fertsch D. Macrophages from endotoxin-hyporesponsive (Lpsd) C3H/HeJ mice are permissive for vesicular stomatitis virus because of reduced levels of endogenous interferon: possible mechanism for natural resistance to virus infection. *J Virol*. 1987;61(3):812–8. <https://doi.org/10.1128/JVI.61.3.812-818.1987> PMID: [2433468](#)
48. D'agostino PM, Amenta JJ, Reiss CS. IFN-beta-induced alteration of VSV protein phosphorylation in neuronal cells. *Viral Immunol*. 2009;22(6):353–69. <https://doi.org/10.1089/vim.2009.0057> PMID: [19951173](#)
49. Smith GL, Benfield CTO, Maluquer de Motes C, Mazzon M, Ember SWJ, Ferguson BJ, et al. Vaccinia virus immune evasion: mechanisms, virulence and immunogenicity. *J Gen Virol*. 2013;94(Pt 11):2367–92. <https://doi.org/10.1099/vir.0.055921-0> PMID: [23999164](#)
50. Smith GL, Talbot-Cooper C, Lu Y. How Does Vaccinia Virus Interfere With Interferon? *Adv Virus Res*. 2018;100:355–78. <https://doi.org/10.1016/bs.aivir.2018.01.003> PMID: [29551142](#)
51. Zhang Y-G, Zhang H-X, Chen H-W, Lv P, Su J, Chen Y-R, et al. Type I/type III IFN and related factors regulate JEV infection and BBB endothelial integrity. *J Neuroinflammation*. 2023;20(1):216. <https://doi.org/10.1186/s12974-023-02891-x> PMID: [37752509](#)
52. Klinkhammer J, Schnepf D, Ye L, Schwaderlapp M, Gad HH, Hartmann R, et al. IFN- $\lambda$  prevents influenza virus spread from the upper airways to the lungs and limits virus transmission. *Elife*. 2018;7:e33354. <https://doi.org/10.7554/eLife.33354> PMID: [29651984](#)
53. Lazear HM, Nice TJ, Diamond MS. Interferon- $\lambda$ : Immune Functions at Barrier Surfaces and Beyond. *Immunity*. 2015;43(1):15–28. <https://doi.org/10.1016/j.immuni.2015.07.001> PMID: [26200010](#)
54. Hou G, Son J, Gomez Castro MF, Kawagishi T, Ren X, Roth AN, et al. Innate immune sensing of rotavirus by intestinal epithelial cells leads to diarrhea. *Cell Host & Microbe*. 2025;33(3):408–419.e8. <https://doi.org/10.1016/j.chom.2025.02.005>
55. Stanifer ML, Kischnick C, Rippert A, Albrecht D, Boulant S. Reovirus inhibits interferon production by sequestering IRF3 into viral factories. *Sci Rep*. 2017;7(1):10873. <https://doi.org/10.1038/s41598-017-11469-6> PMID: [28883463](#)
56. Sojati J, Parks OB, Zhang Y, Walters S, Lan J, Eddens T, et al. IFN- $\lambda$  drives distinct lung immune landscape changes and antiviral responses in human metapneumovirus infection. *mBio*. 2024;15(5):e0055024. <https://doi.org/10.1128/mbio.00550-24> PMID: [38530032](#)
57. Schwanke H, Stempel M, Brinkmann MM. Of Keeping and Tipping the Balance: Host Regulation and Viral Modulation of IRF3-Dependent IFNB1 Expression. *Viruses*. 2020;12(7):733. <https://doi.org/10.3390/v12070733>

58. Triana S, Metz-Zumaran C, Ramirez C, Kee C, Doldan P, Shahraz M, et al. Single-cell analyses reveal SARS-CoV-2 interference with intrinsic immune response in the human gut. *Mol Syst Biol*. 2021;17(4):e10232. <https://doi.org/10.15252/msb.202110232> PMID: [33904651](https://pubmed.ncbi.nlm.nih.gov/33904651/)
59. Schneider WM, Chevillotte MD, Rice CM. Interferon-stimulated genes: a complex web of host defenses. *Annu Rev Immunol*. 2014;32:513–45. <https://doi.org/10.1146/annurev-immunol-032713-120231> PMID: [24555472](https://pubmed.ncbi.nlm.nih.gov/24555472/)
60. Lazear HM, Schoggins JW, Diamond MS. Shared and Distinct Functions of Type I and Type III Interferons. *Immunity*. 2019;50(4):907–23. <https://doi.org/10.1016/j.immuni.2019.03.025> PMID: [30995506](https://pubmed.ncbi.nlm.nih.gov/30995506/)
61. Miknis ZJ, Magracheva E, Li W, Zdanov A, Kutenko SV, Wlodawer A. Crystal structure of human interferon- $\lambda$ 1 in complex with its high-affinity receptor interferon- $\lambda$ R1. *J Mol Biol*. 2010;404(4):650–64. <https://doi.org/10.1016/j.jmb.2010.09.068> PMID: [20934432](https://pubmed.ncbi.nlm.nih.gov/20934432/)
62. Mendoza JL, Schneider WM, Hoffmann H-H, Vercauteren K, Jude KM, Xiong A, et al. The IFN- $\lambda$ -IFN- $\lambda$ R1-IL-10R $\beta$  Complex Reveals Structural Features Underlying Type III IFN Functional Plasticity. *Immunity*. 2017;46(3):379–92. <https://doi.org/10.1016/j.immuni.2017.02.017> PMID: [28329704](https://pubmed.ncbi.nlm.nih.gov/28329704/)
63. Arnold M, Patton JT, McDonald SM. Culturing, storage, and quantification of rotaviruses. *Curr Protoc Microbiol*. 2009;Chapter 15:Unit 15C.3. <https://doi.org/10.1002/9780471729259.mc15c03s15> PMID: [19885940](https://pubmed.ncbi.nlm.nih.gov/19885940/)
64. Stanifer ML, Rippert A, Kazakov A, Willemsen J, Bucher D, Bender S, et al. Reovirus intermediate subviral particles constitute a strategy to infect intestinal epithelial cells by exploiting TGF- $\beta$  dependent pro-survival signaling. *Cell Microbiol*. 2016;18(12):1831–45. <https://doi.org/10.1111/cmi.12626> PMID: [27279006](https://pubmed.ncbi.nlm.nih.gov/27279006/)
65. Mercer J, Helenius A. Vaccinia virus uses macropinocytosis and apoptotic mimicry to enter host cells. *Science*. 2008;320(5875):531–5. <https://doi.org/10.1126/science.1155164> PMID: [18436786](https://pubmed.ncbi.nlm.nih.gov/18436786/)
66. Cotter CA, Earl PL, Wyatt LS, Moss B. Preparation of Cell Cultures and Vaccinia Virus Stocks. *Curr Protoc Microbiol*. 2015;39:14A.3.1–.18. <https://doi.org/10.1002/9780471729259.mc14a03s39> PMID: [26528781](https://pubmed.ncbi.nlm.nih.gov/26528781/)
67. Cureton DK, Massol RH, Saffarian S, Kirchhausen TL, Whelan SPJ. Vesicular stomatitis virus enters cells through vesicles incompletely coated with clathrin that depend upon actin for internalization. *PLoS Pathog*. 2009;5(4):e1000394. <https://doi.org/10.1371/journal.ppat.1000394> PMID: [19390604](https://pubmed.ncbi.nlm.nih.gov/19390604/)
